# Supplementary material for: Sarcoconvolutums F and G: Polyoxygenated Cembrane-Type Diterpenoids from Sarcophyton convolutum, a Red Sea Soft Coral
Source: MDPI journal article supplement (doi:10.3390/molecules27185835), 2022-09-08
Supplement: s1 [file s1]

# Sarcoconvolutums F and G: Polyoxygenated Cembrane-Type Diterpenoids from *Sarcophyton convolutum*, a Red Sea Soft Coral

Tarik A. Mohamed <sup>1</sup>, Abdelsamed I. Elshamy <sup>2</sup>, Mohamed H. Abd El-Razek <sup>2</sup>, Asmaa M. Abdel-Tawab <sup>3</sup>, Sherin K. Ali <sup>1</sup>, Mohamed Aboelmagd <sup>4</sup>, Midori Suenaga <sup>5</sup>, Paul W. Pare <sup>6</sup>, Akemi Umeyama <sup>5</sup> and Mohamed-Elamir F. Hegazy <sup>1,\*</sup>

<sup>1</sup> Chemistry of Medicinal Plants Department, National Research Centre, 33 El-Bohouth St., Dokki, Giza 12622, Egypt

<sup>2</sup> Department of Natural Compounds Chemistry, National Research Centre, 33 El-Bohouth St., Dokki, Giza 12622, Egypt

<sup>3</sup> Marine Biotechnology and Natural Products Laboratory, National Institute of Oceanography and Fisheries, Cairo 11516, Egypt

<sup>4</sup> Pharmacognosy Department, National Research Centre, 33 El-Bohouth St., Dokki, Giza 12622, Egypt

<sup>5</sup> Faculty of Pharmaceutical Sciences, Tokushima Bunri University, Yamashiro-cho, Tokushima 770-8514, Japan

<sup>6</sup> Department of Chemistry & Biochemistry, Texas Tech University, Lubbock, TX 79409, USA

\* Correspondence: mohegazy@uni-mainz.de; Tel.: +2-033-371-635

| Supporting data                                                                 | Page |
|---------------------------------------------------------------------------------|------|
| Figure S1: <sup>1</sup> H NMR (CDCl <sub>3</sub> , 500 MHz) of <b>1</b> .....   | 3    |
| Figure S2: <sup>13</sup> C NMR (CDCl <sub>3</sub> , 125 MHz) of <b>1</b> .....  | 4    |
| Figure S3:DEPT of <b>1</b> .....                                                | 5    |
| Figure S4:HSQC of <b>1</b> .....                                                | 6    |
| Figure S5:HMBC of <b>1</b> .....                                                | 7    |
| Figure S6: <sup>1</sup> H- <sup>1</sup> H COSY of <b>1</b> .....                | 8    |
| Figure S7:NOESY <b>1</b> .....                                                  | 9    |
| Figure S8: HRCI/MS <b>1</b> .....                                               | 10   |
| Figure S9: <sup>1</sup> H NMR (CDCl <sub>3</sub> , 500 MHz) of <b>2</b> .....   | 13   |
| Figure S10: <sup>13</sup> C NMR (CDCl <sub>3</sub> , 125 MHz) of <b>2</b> ..... | 14   |
| Figure S11:DEPT of <b>2</b> .....                                               | 16   |
| Figure S12:HSQC of <b>2</b> .....                                               | 17   |
| Figure S13:HMBC of <b>2</b> .....                                               | 18   |
| Figure S14: <sup>1</sup> H- <sup>1</sup> H COSY of <b>2</b> .....               | 19   |
| Figure S15:NOESY <b>2</b> .....                                                 | 20   |
| Figure S16: CI/MS <b>2</b> .....                                                | 21   |
| Figure S17: HRCI/MS <b>2</b> .....                                              | 19   |
| Figure S18: <sup>1</sup> H NMR (CDCl <sub>3</sub> , 500 MHz) of <b>3</b> .....  | 20   |
| Figure S19: <sup>13</sup> C NMR (CDCl <sub>3</sub> , 125 MHz) of <b>3</b> ..... | 21   |
| Figure S20: <sup>1</sup> H NMR (CDCl <sub>3</sub> , 500 MHz) of <b>4</b> .....  | 22   |
| Figure S21: <sup>13</sup> C NMR (CDCl <sub>3</sub> , 125 MHz) of <b>4</b> ..... | 23   |
| Figure S22: <sup>1</sup> H NMR (CDCl <sub>3</sub> , 500 MHz) of <b>5</b> .....  | 24   |
| Figure S23: <sup>13</sup> C NMR (CDCl <sub>3</sub> , 125 MHz) of <b>5</b> ..... | 25   |
| Figure S24: <sup>1</sup> H NMR (CDCl <sub>3</sub> , 500 MHz) of <b>6</b> .....  | 26   |
| Figure S25: <sup>13</sup> C NMR (CDCl <sub>3</sub> , 125 MHz) of <b>6</b> ..... | 27   |
| Figure S26: <sup>1</sup> H NMR (CDCl <sub>3</sub> , 500 MHz) of <b>7</b> .....  | 28   |
| Figure S27: <sup>13</sup> C NMR (CDCl <sub>3</sub> , 125 MHz) of <b>7</b> ..... | 29   |

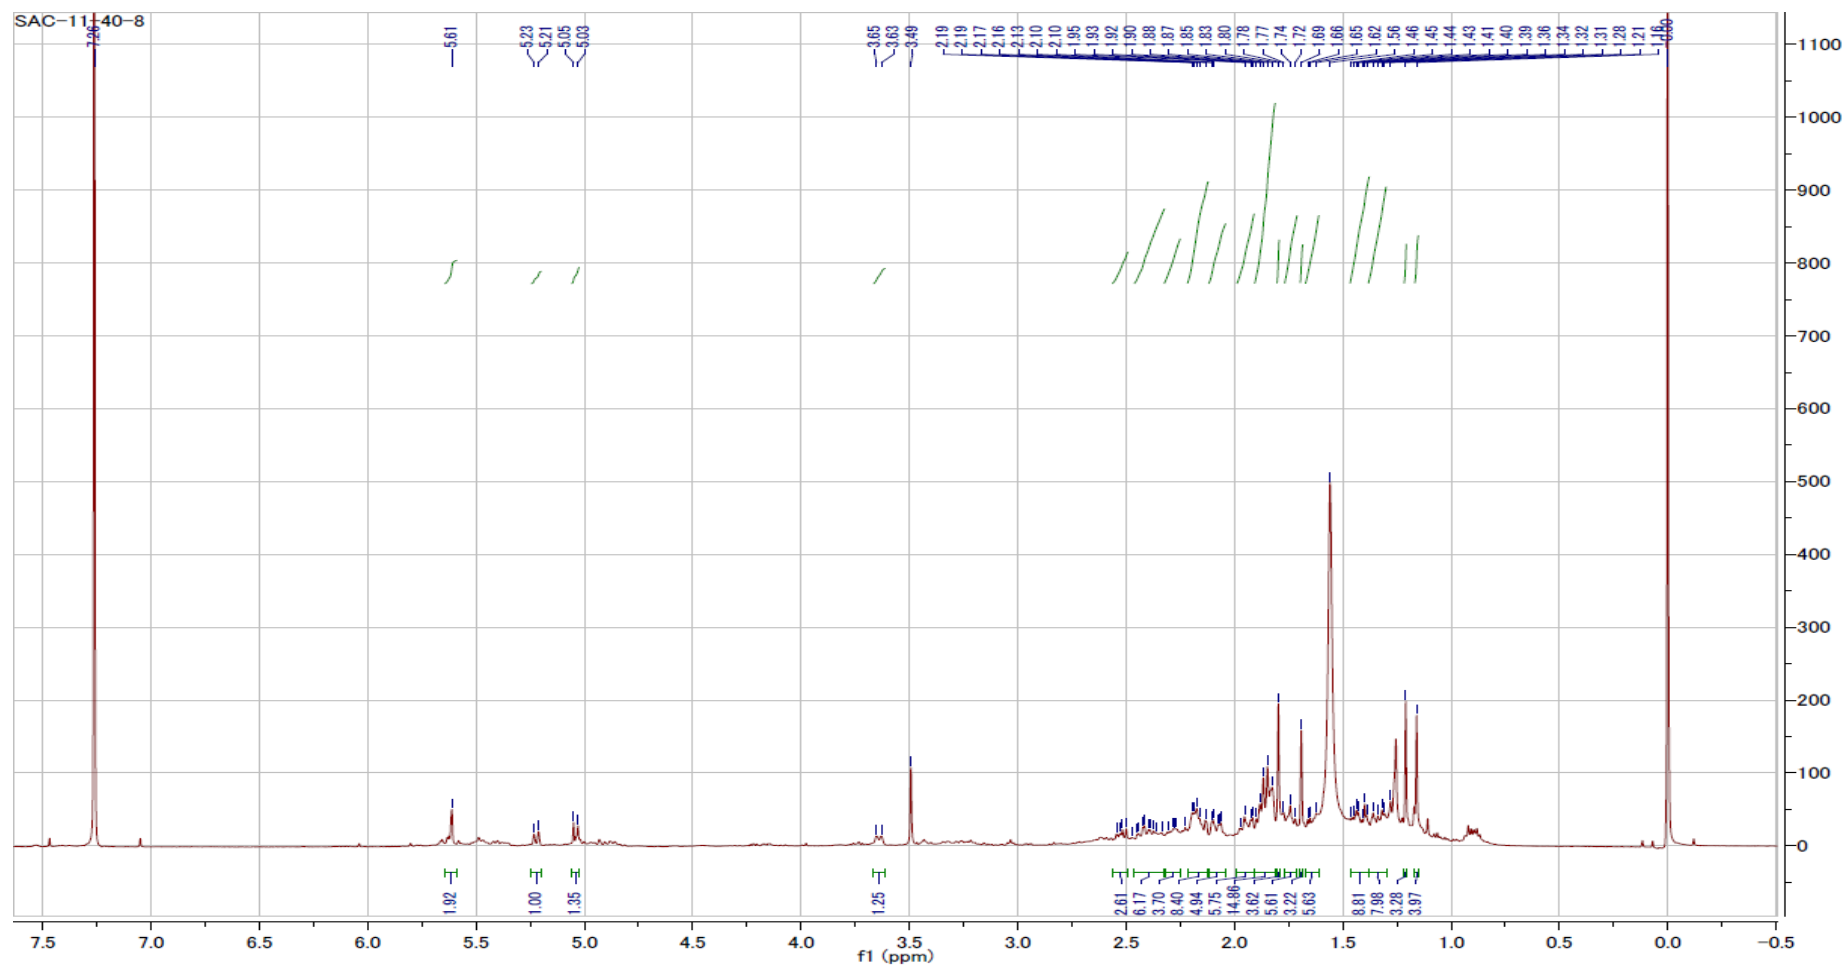

Figure S1. <sup>1</sup>H NMR (CDCl<sub>3</sub>, 500 MHz) of 1.

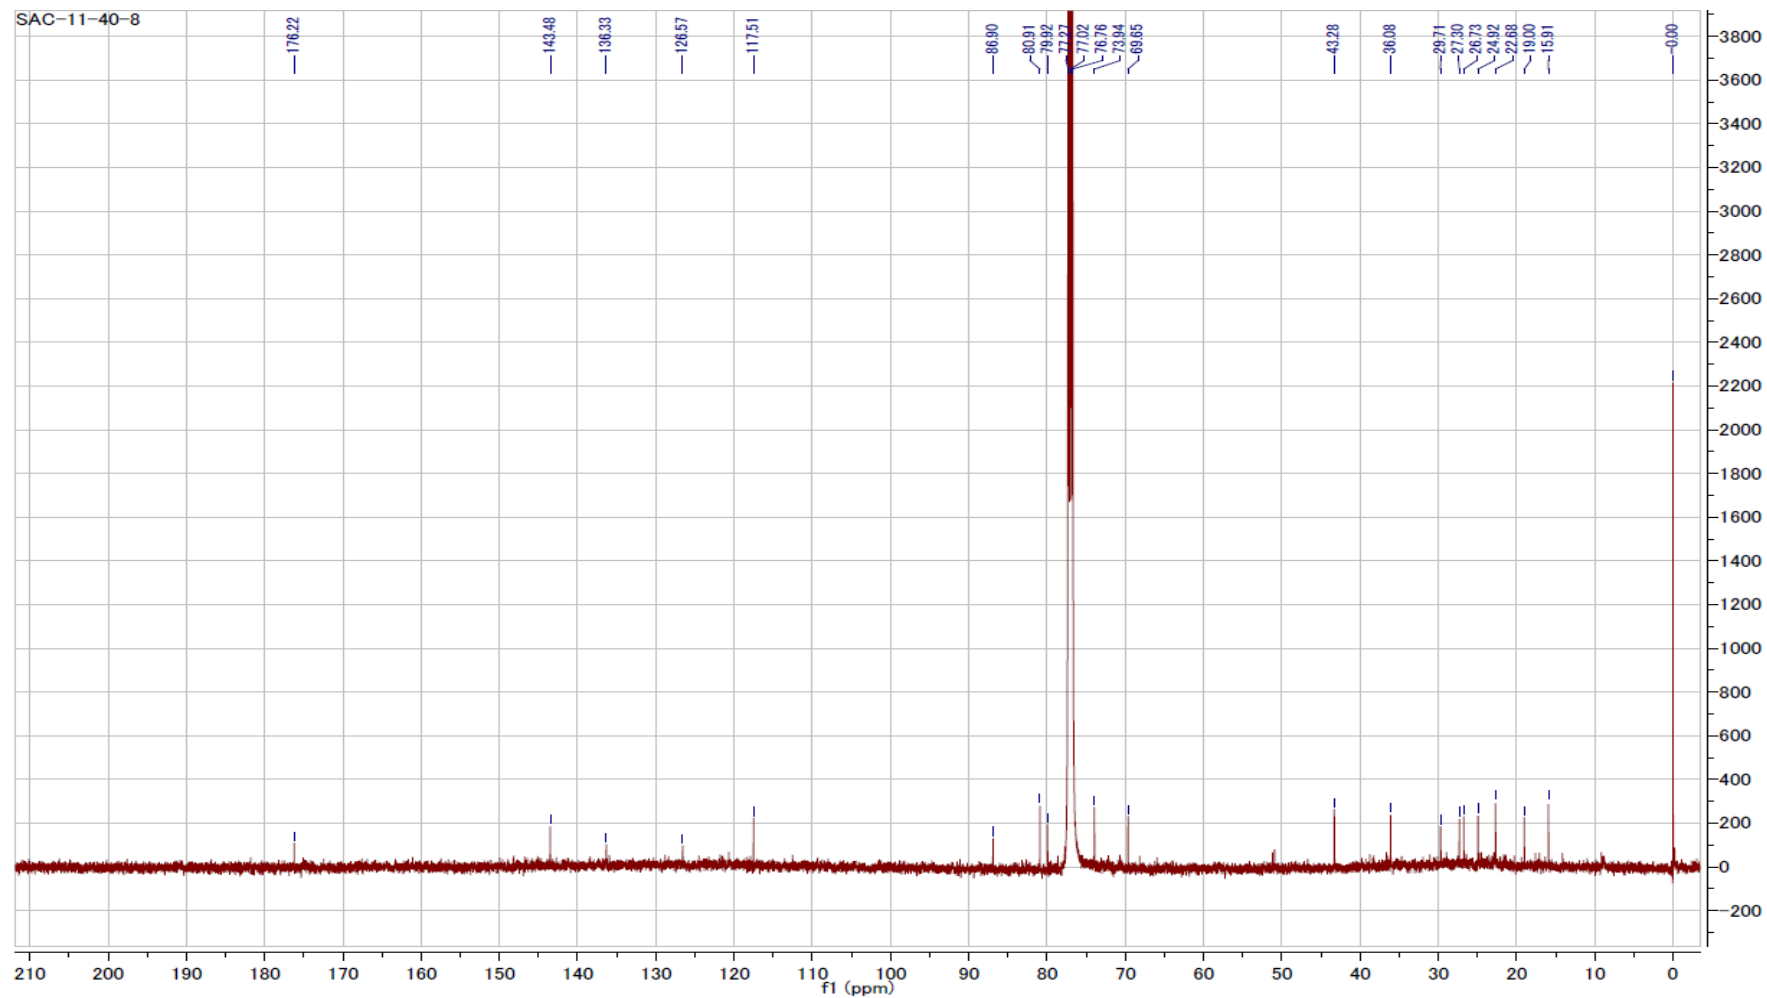

Figure S2.  $^{13}\text{C}$  NMR ( $\text{CDCl}_3$ , 125 MHz) of **1**.

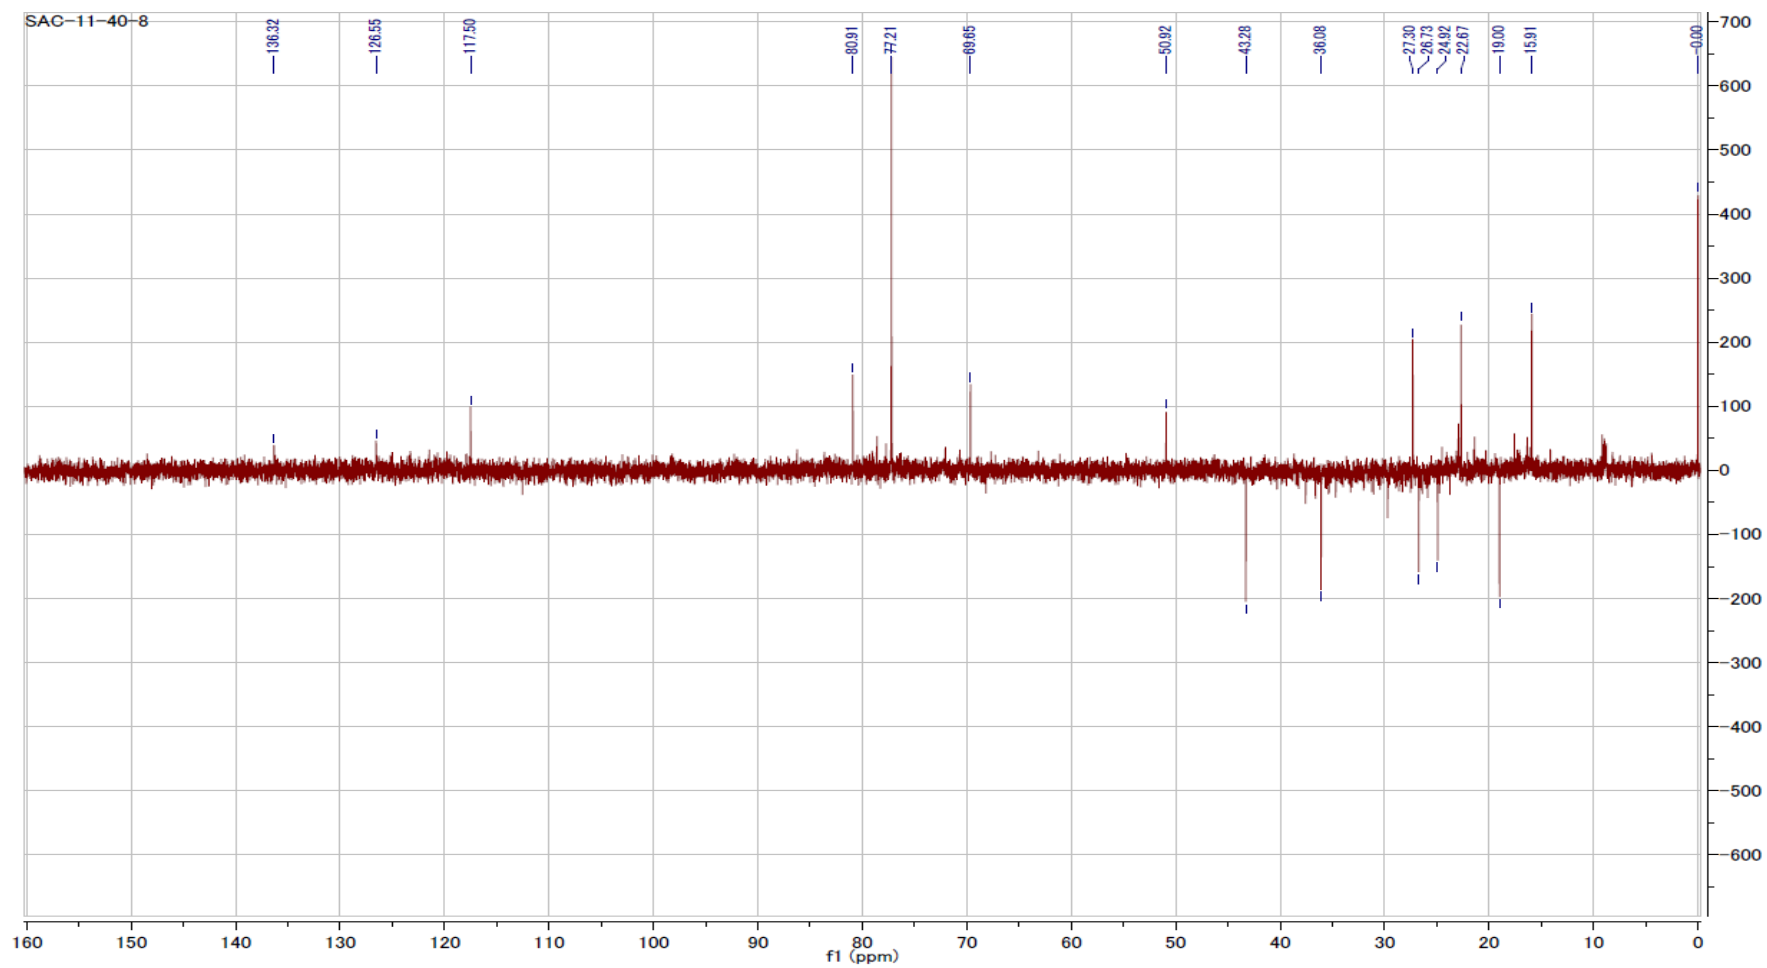

Figure S3. DEPT of 1.

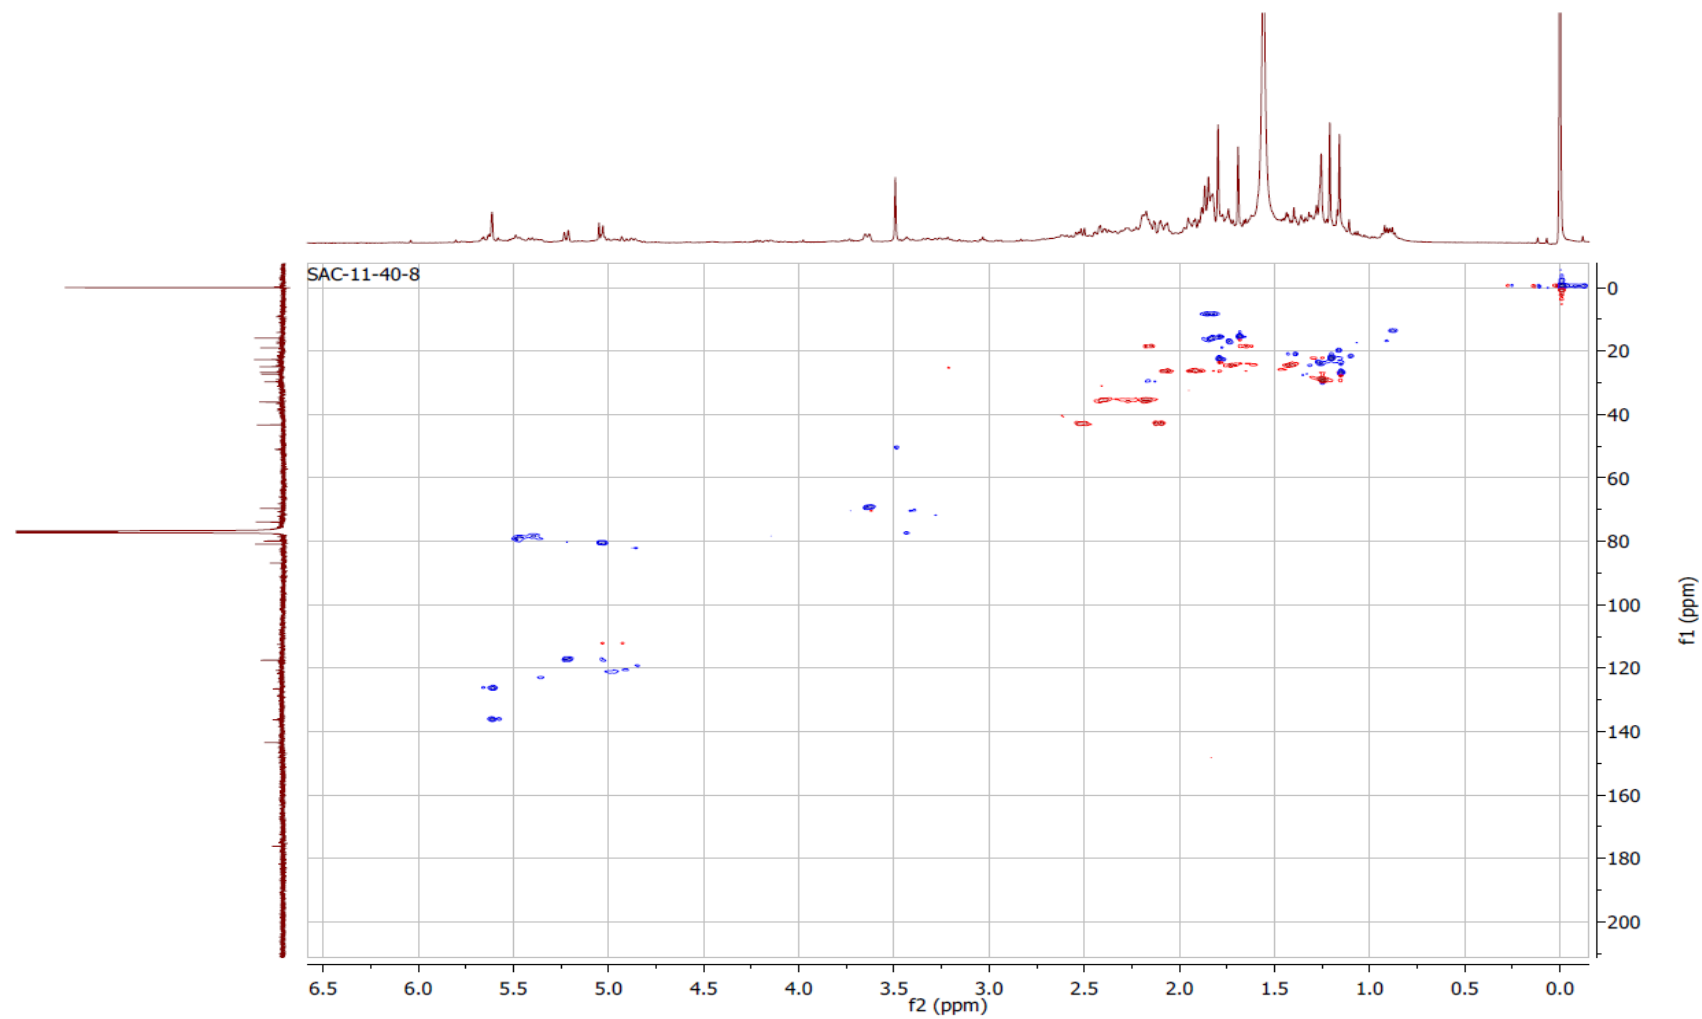

Figure S4. HSQC of 1.

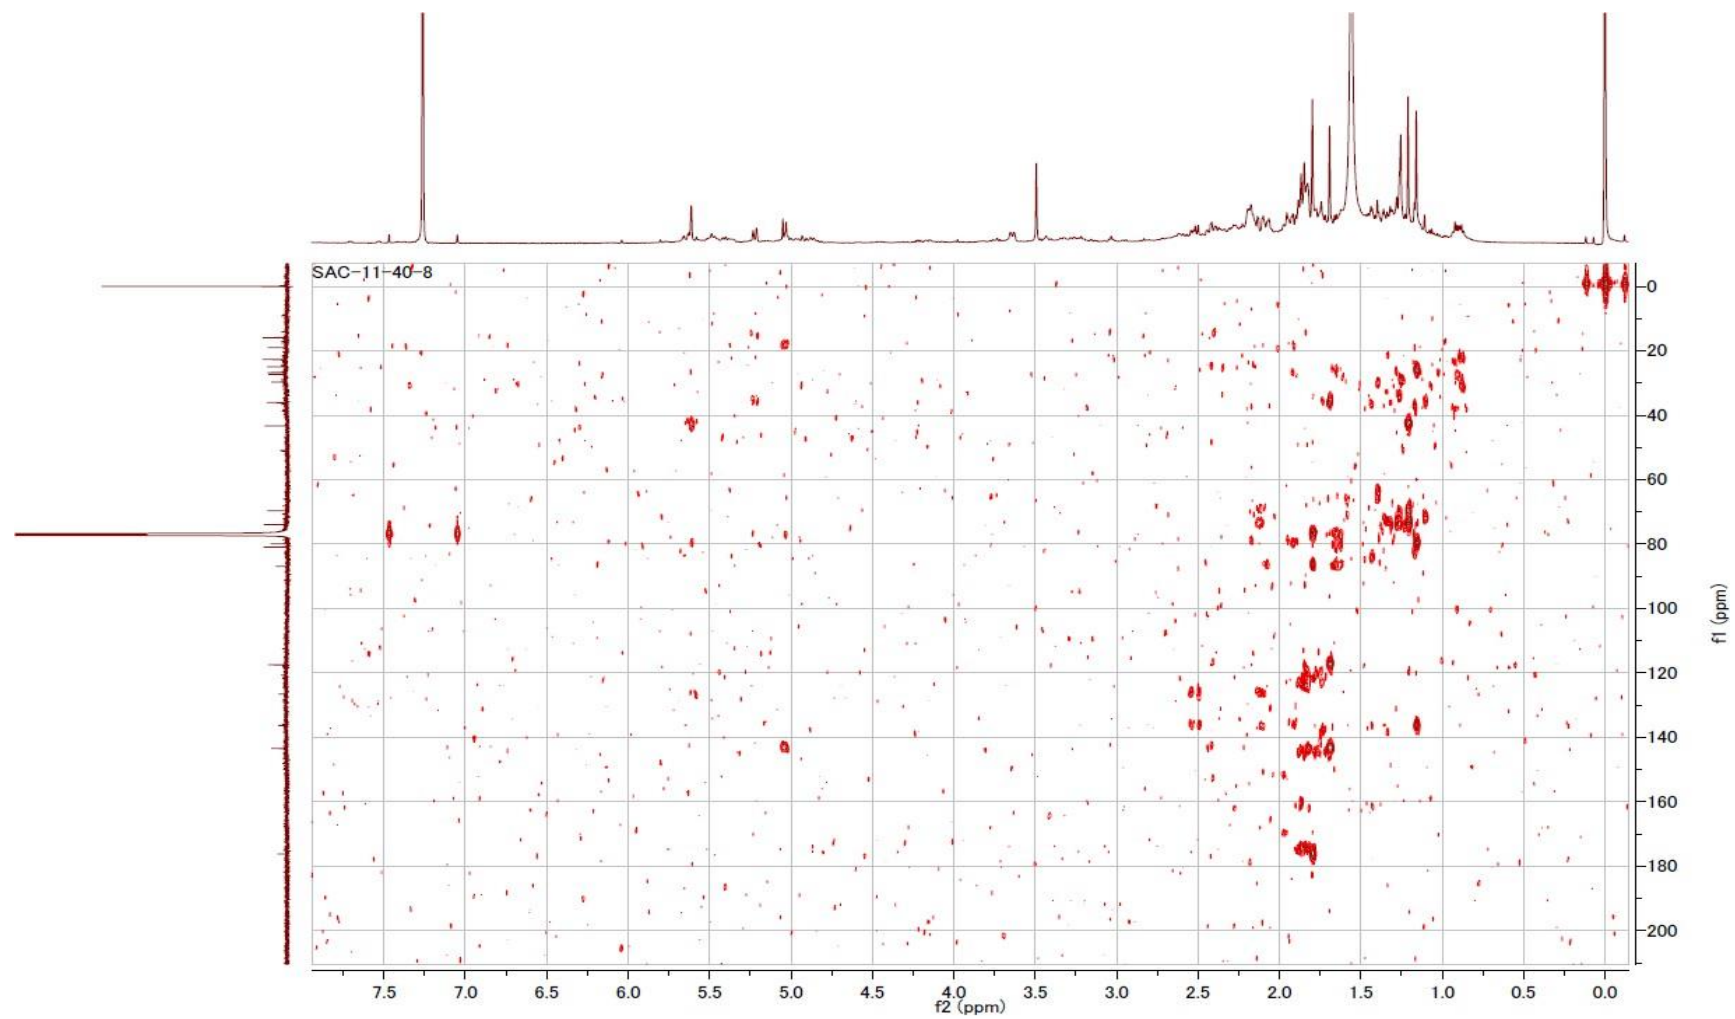

Figure S5. HMBC of 1.

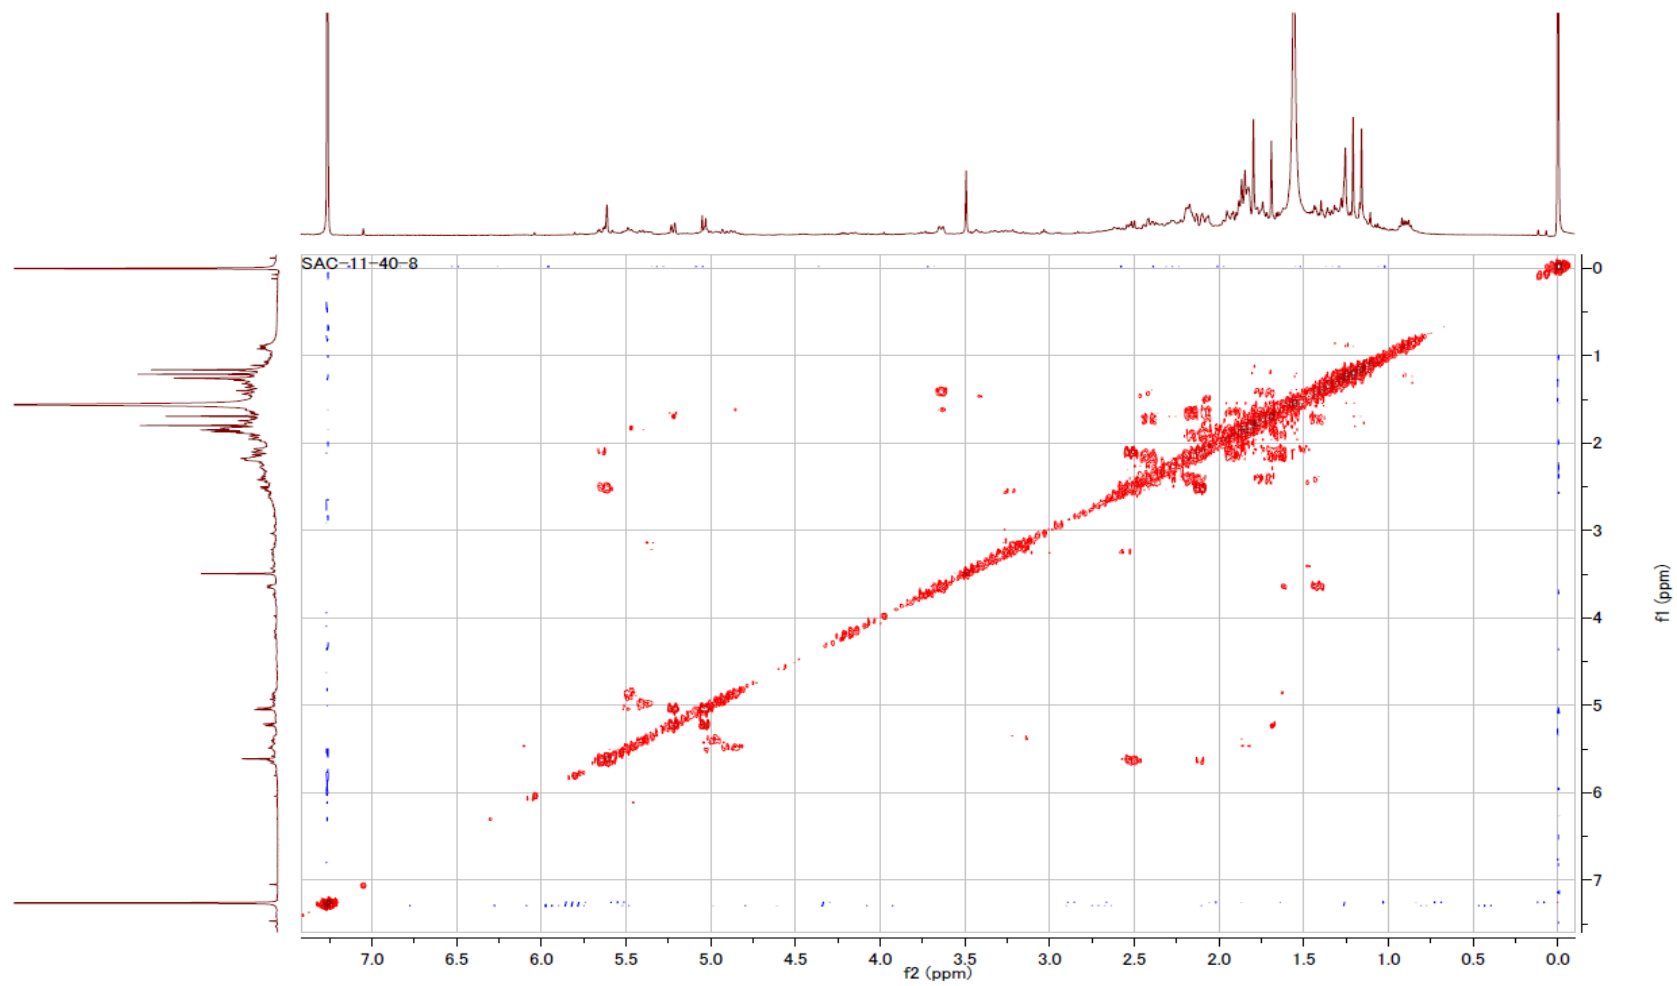

Figure S6.  $^1\text{H}$ - $^1\text{H}$  COSY of **1**.



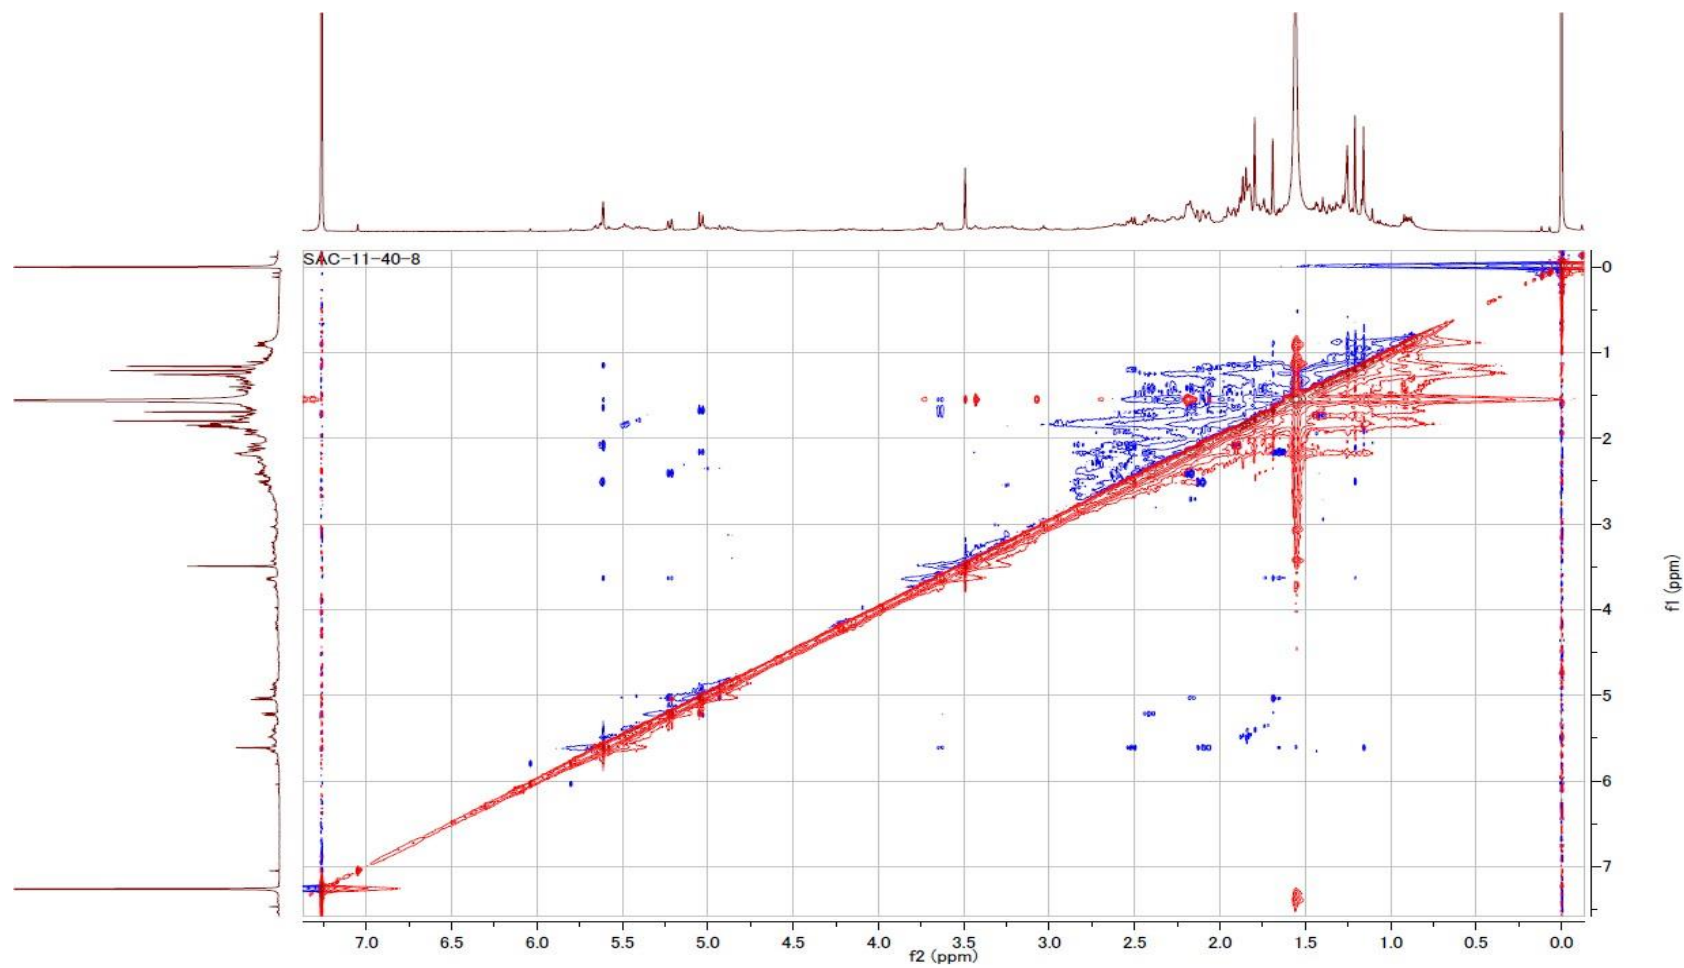

Figure S7. NOESY of 1.

Data: Umeyama-CIHR. 07-Aug-2019.004

Date: 07-Aug-2019 17:02

Instrument: MStation

Sample: SAS-11-40-8

Note: MStation

Inlet: Direct Ion Mode: CI+

RT: 1.04 Scan#: 27

Elements: C 150/0, H 250/0, 50/0

Mass Tolerance: 5mmu

Unsaturation (U.S.): 0.0 – 15.0

| Observed $M/Z$ | Int. % | Err. [ ppm / mmu] | U.S. | Composition |
|----------------|--------|-------------------|------|-------------|
| 1 400.2094     | 16.23  | - 0.8 / -0.3      | 1.5  | C20 H32 O8  |

Figure S8. HRCI/mas of 1.

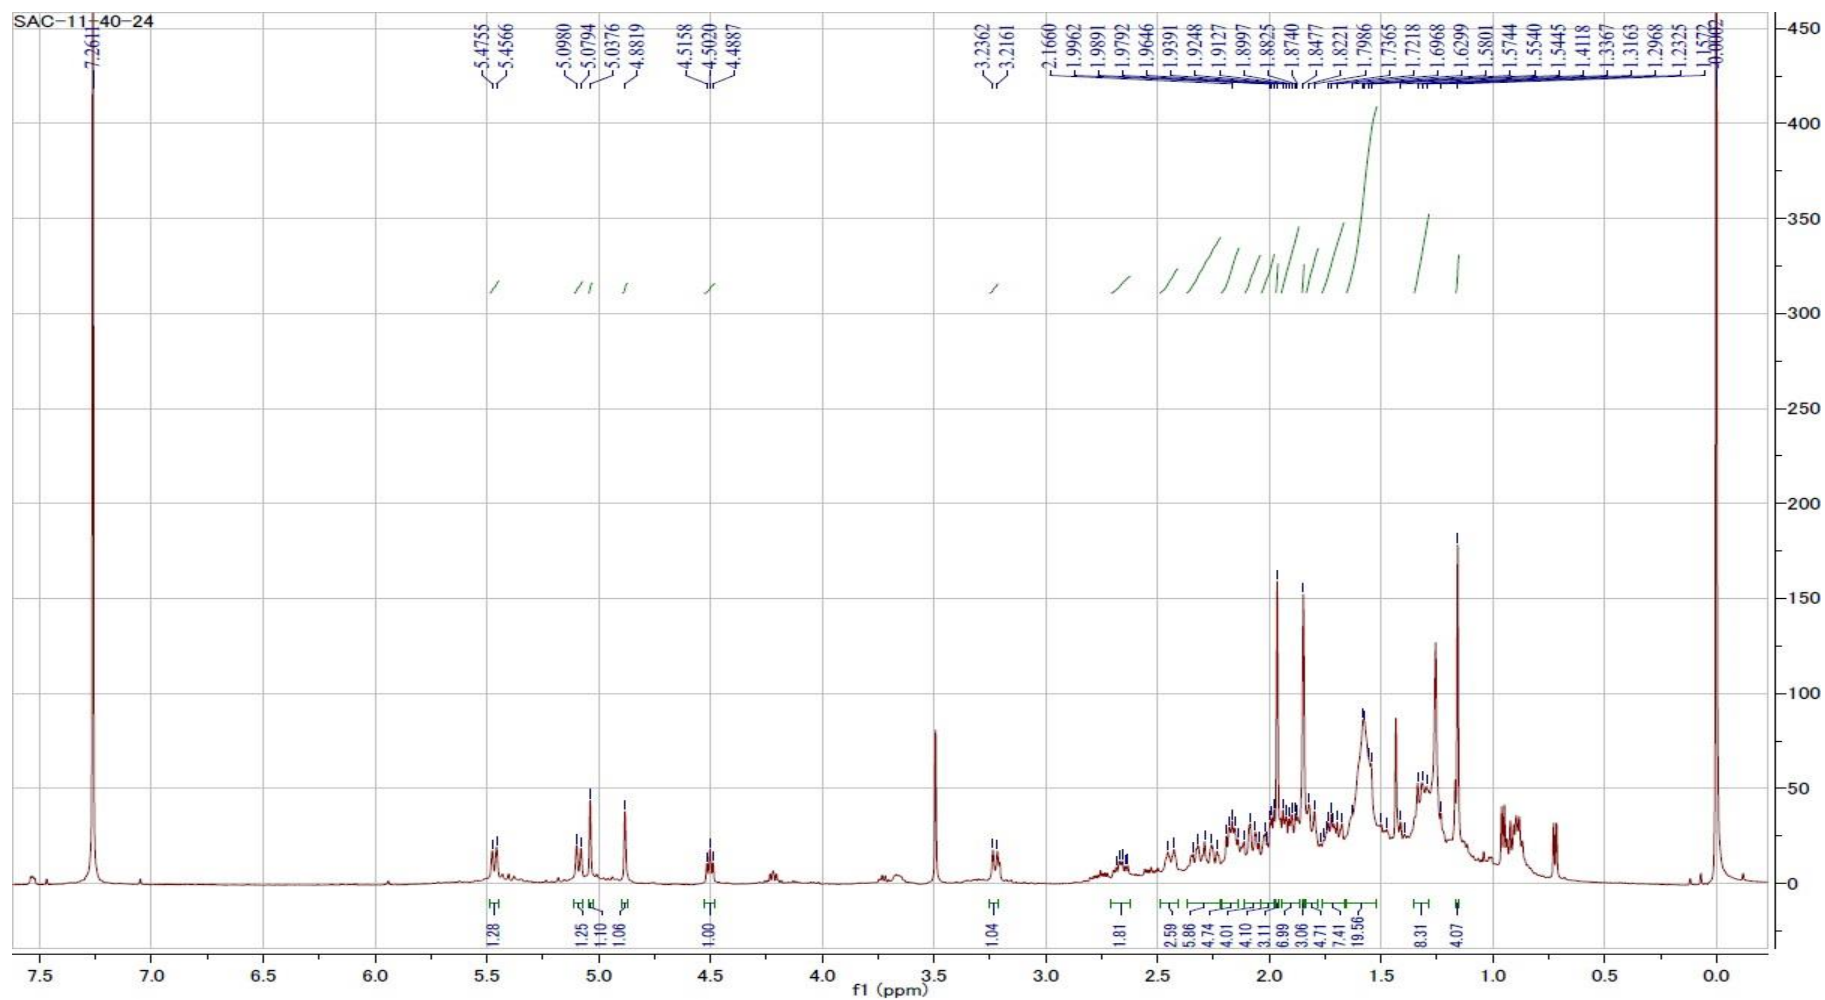

Figure S9.  $^1\text{H}$  NMR (CDCl<sub>3</sub>, 500 MHz) of 2.

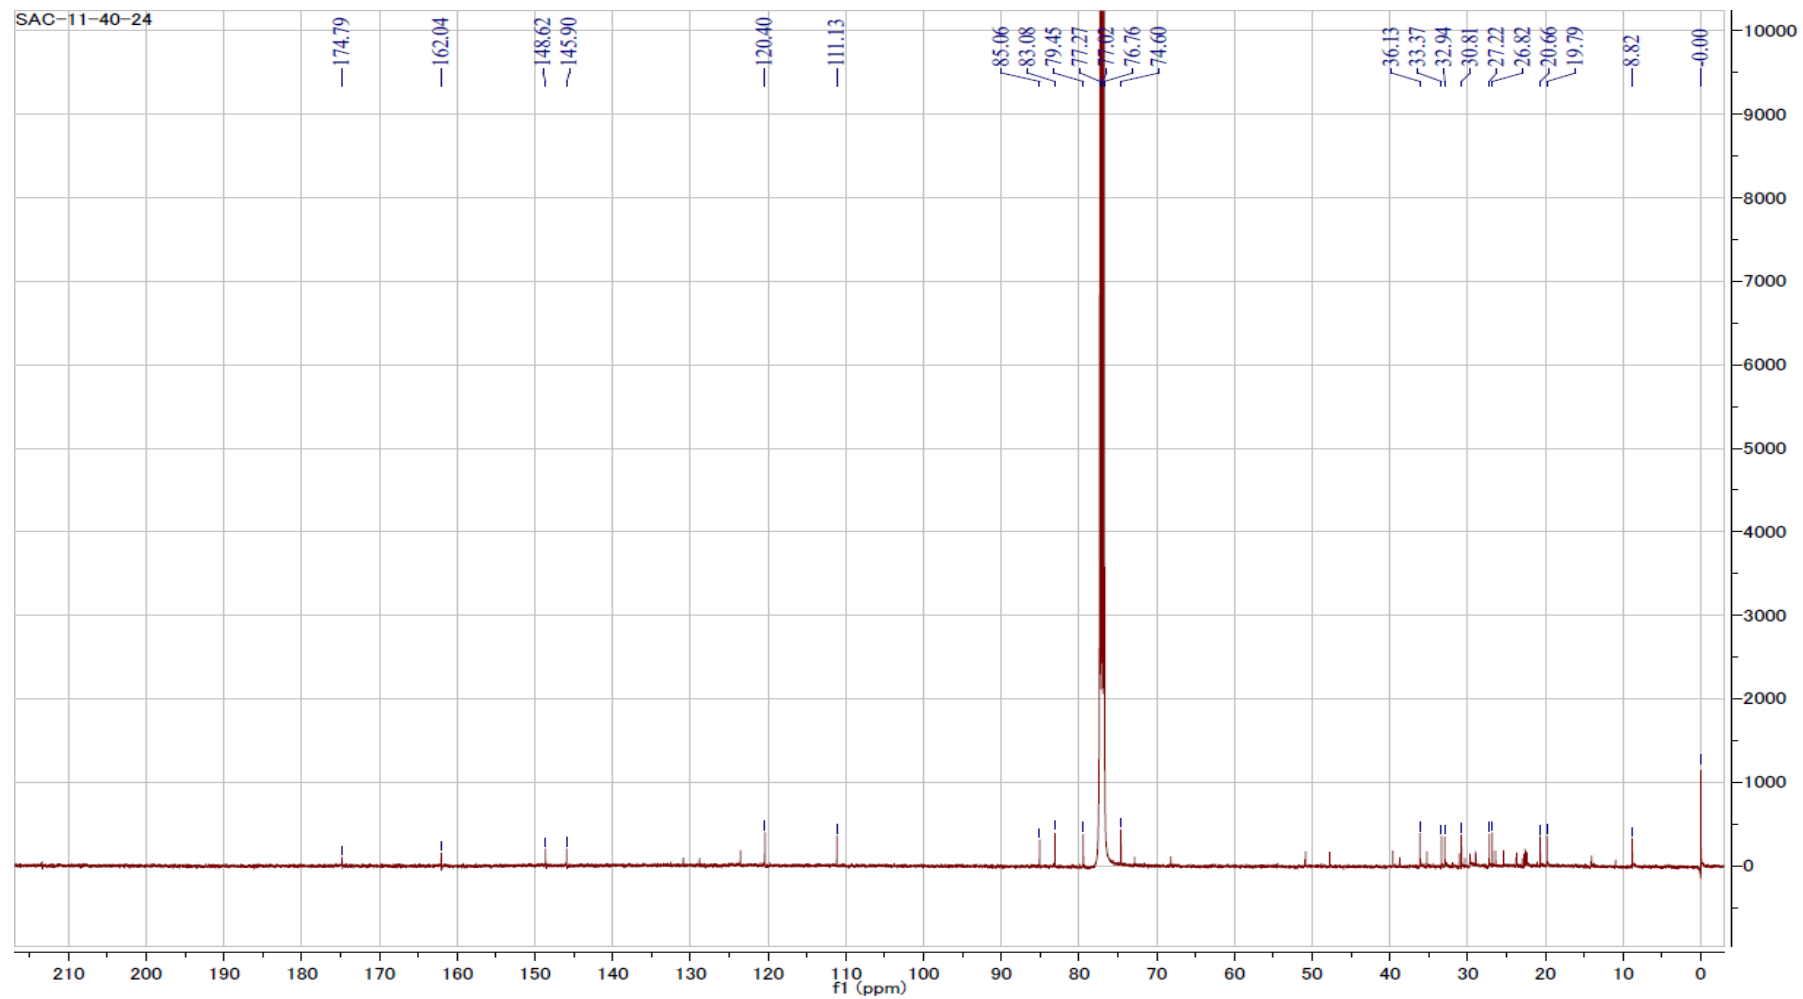

Figure S10. C NMR (CDCl<sub>3</sub>, 125 MHz) of 2.

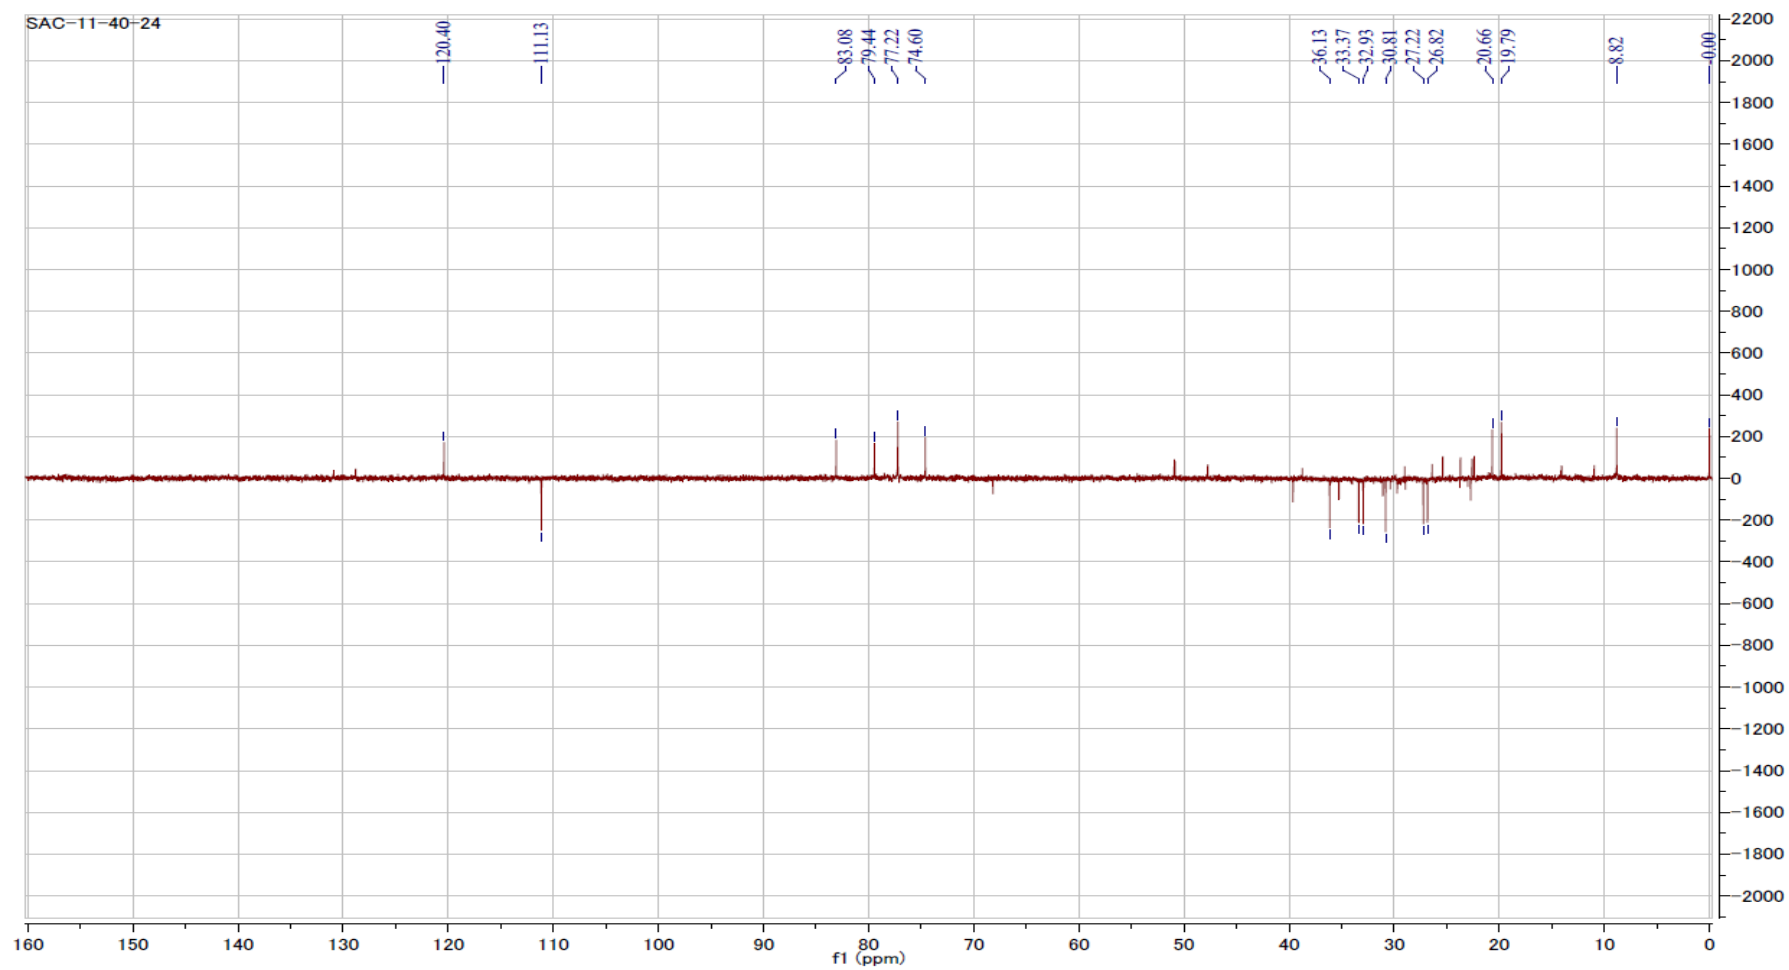

Figure S11. DEPT of 2.

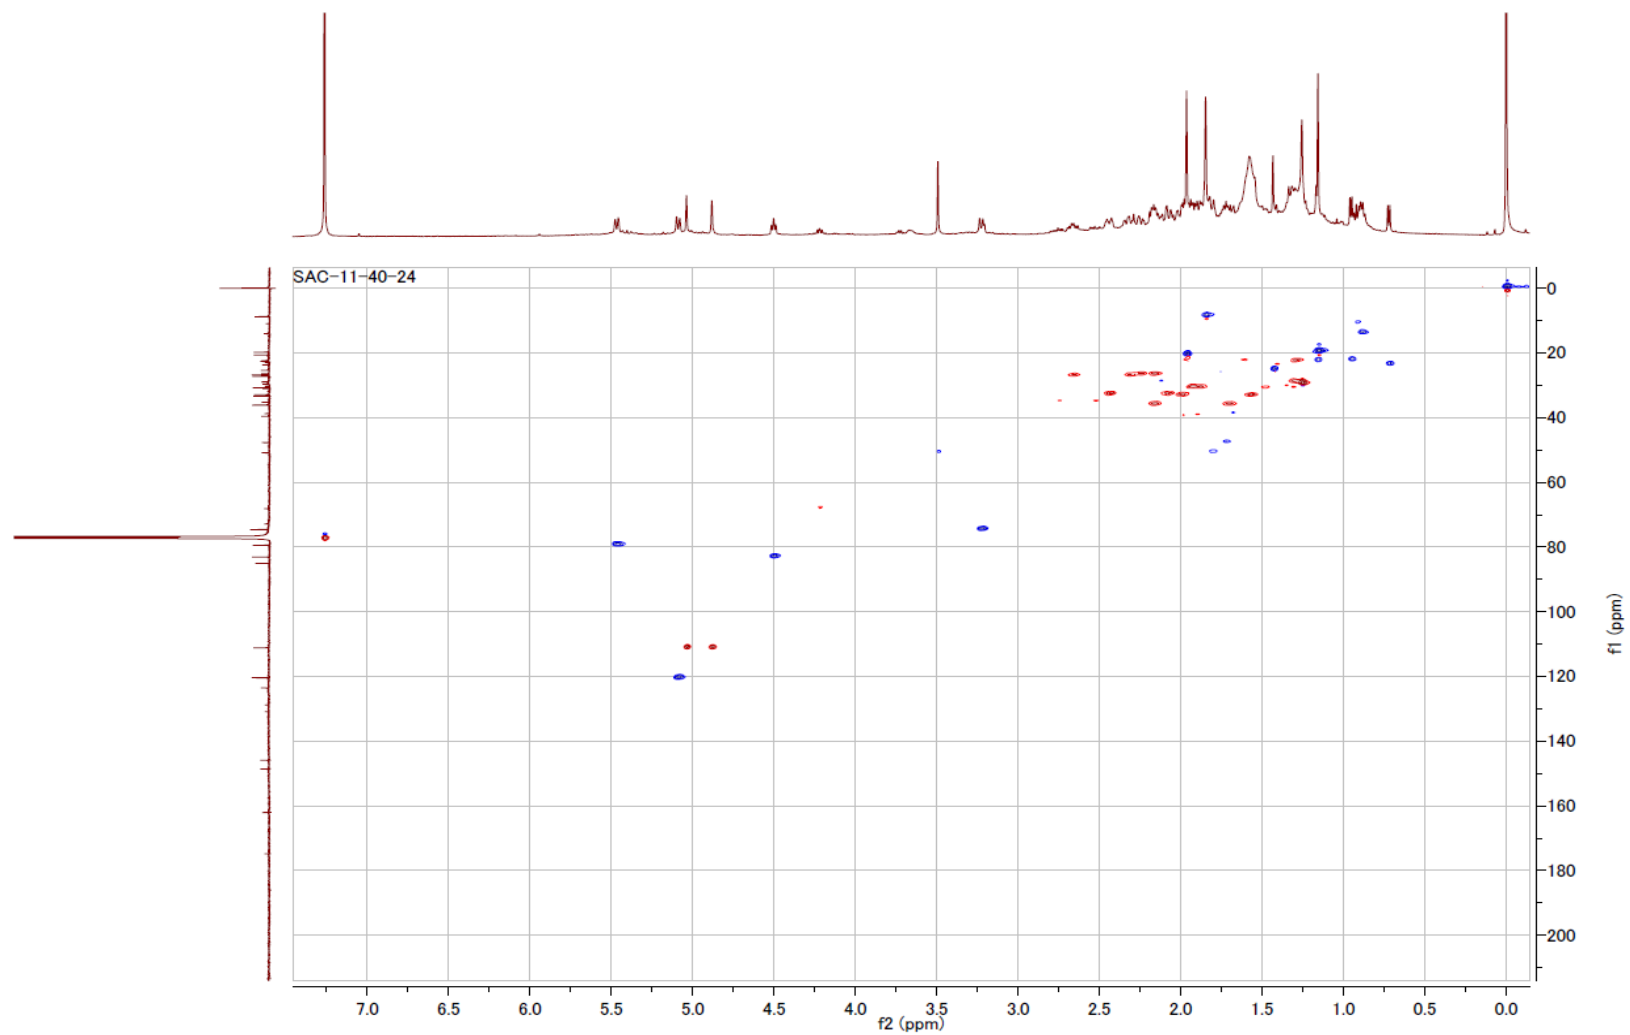

Figure S12. HSQC of 2.

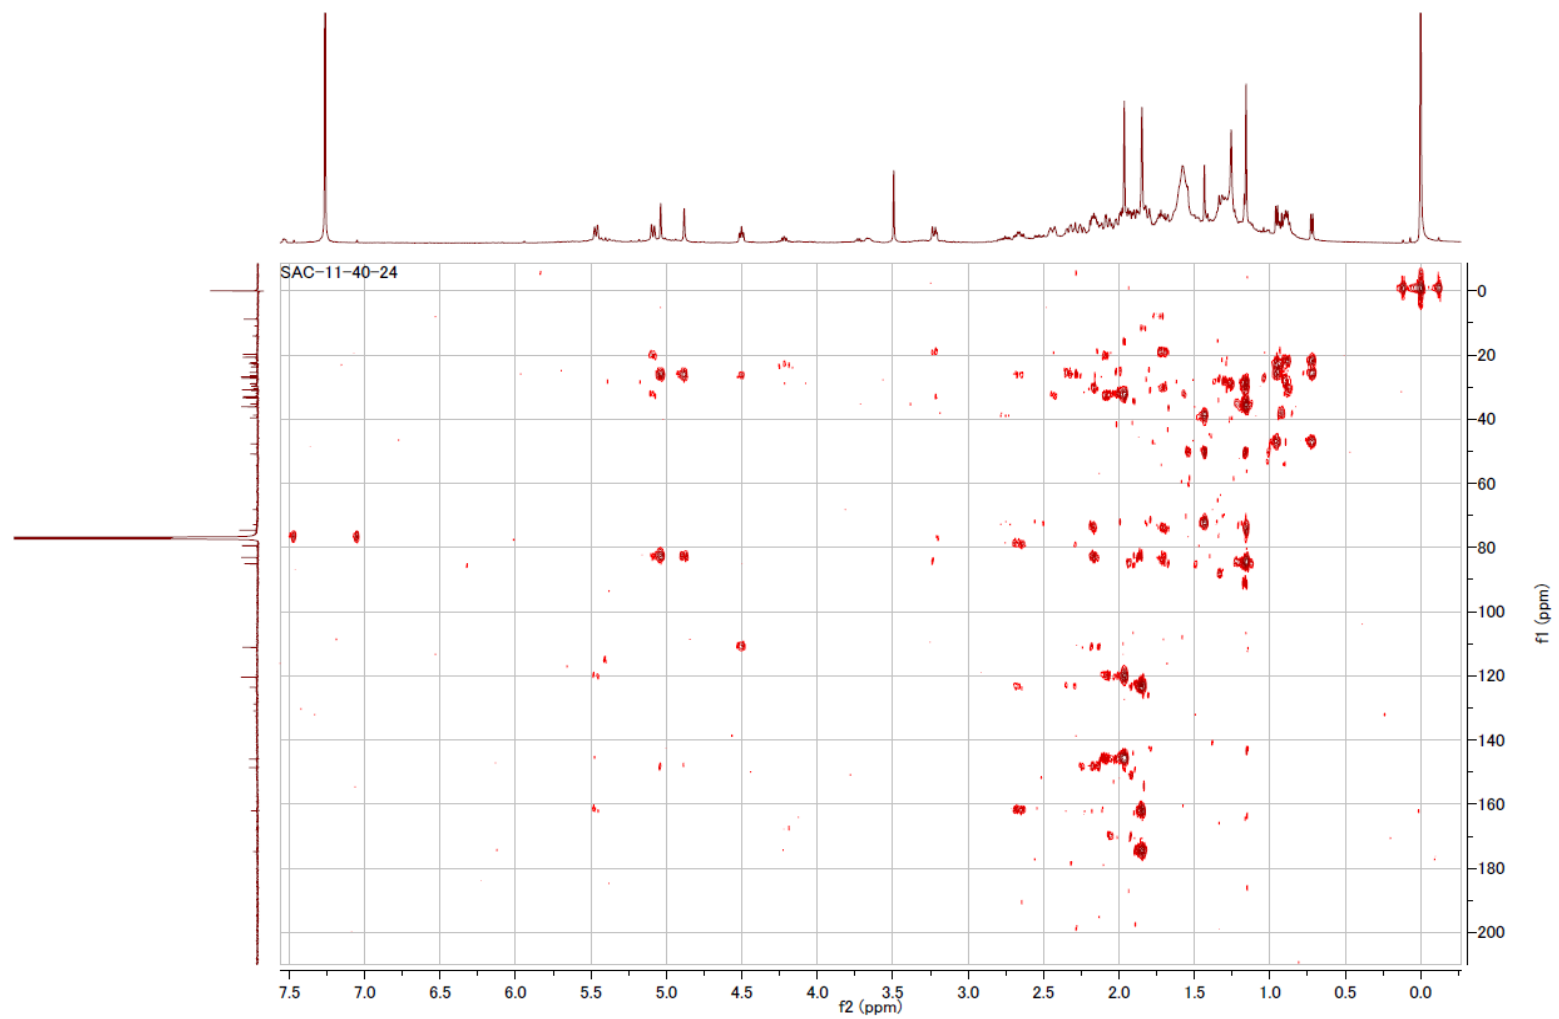

Figure S13. HMBC of 2.

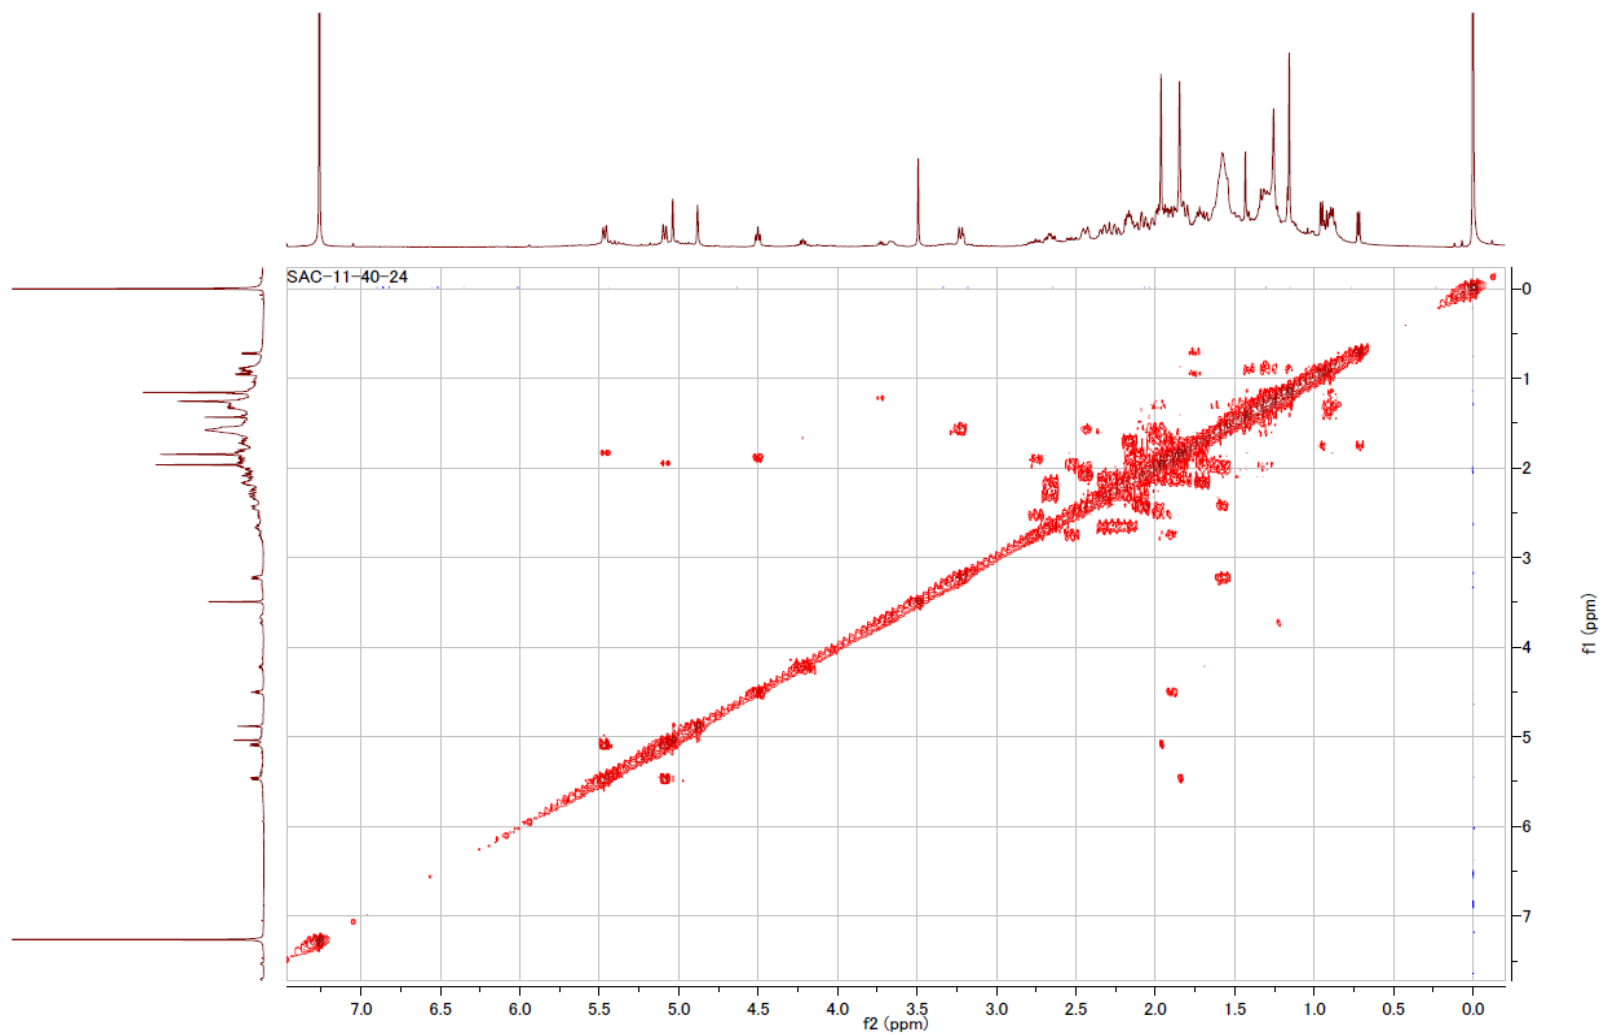

Figure S14.  $^1\text{H}$ - $^1\text{H}$  COSY of 2.



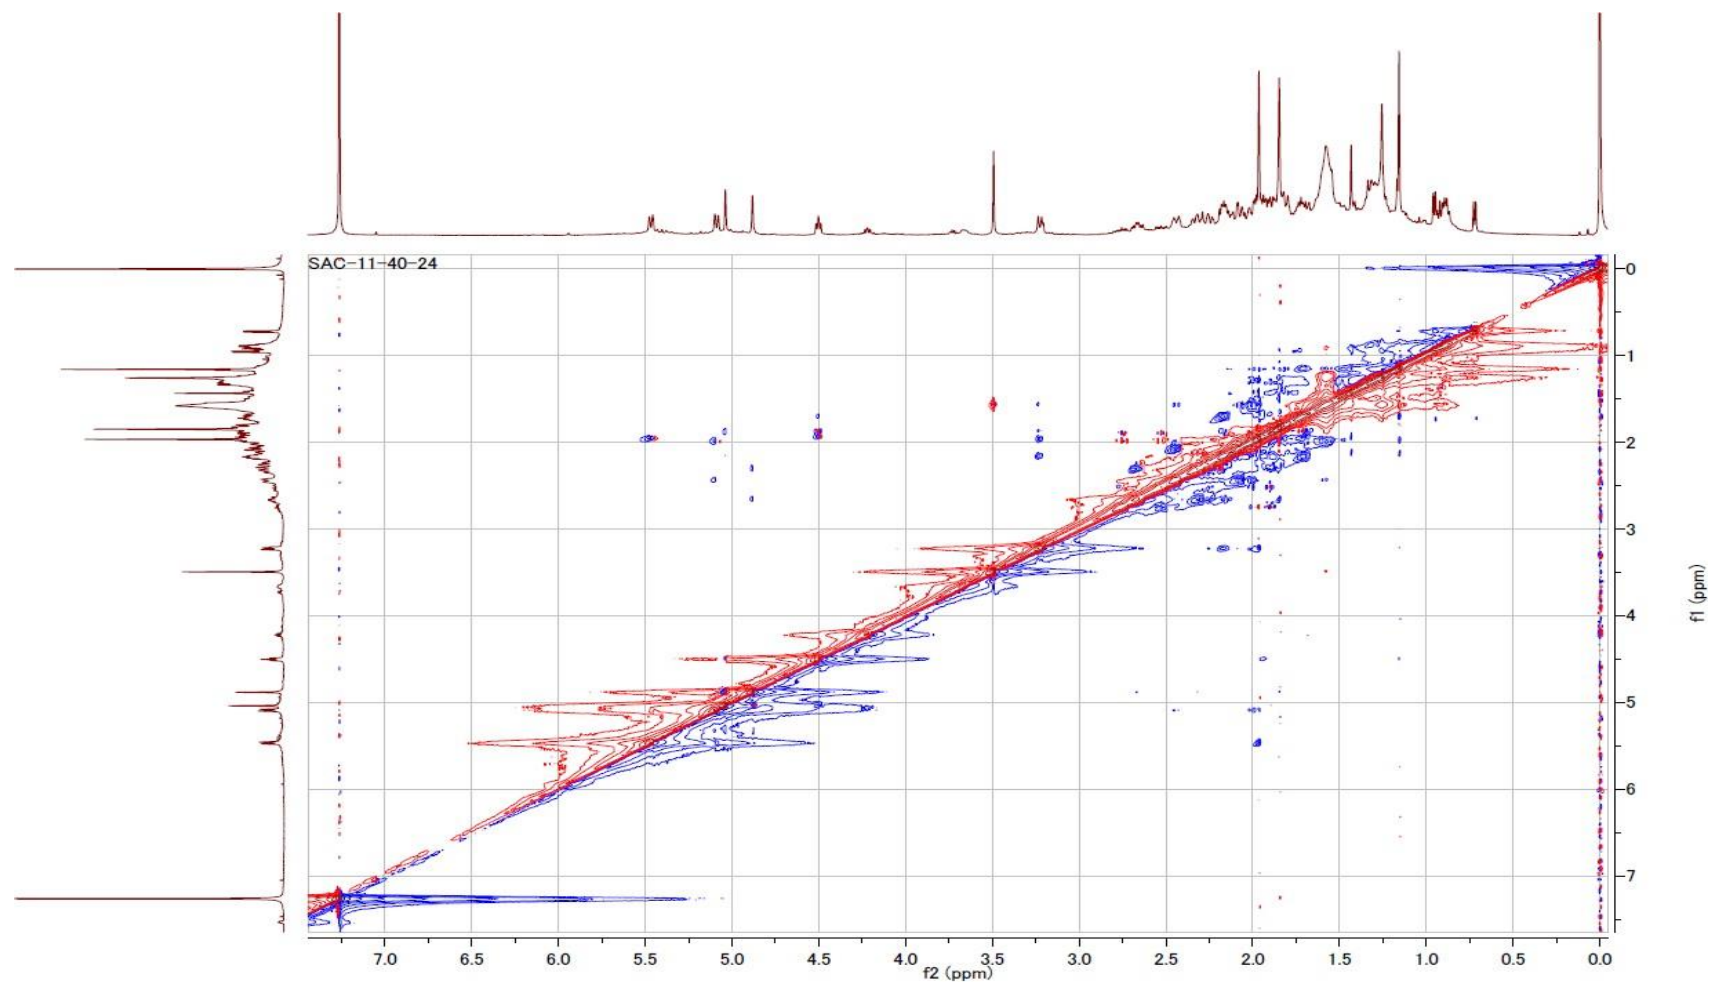

Figure S15. NOESY of 2.

[ Mass Spectrum ]  
Data : Umeyama-Cl.25-Mar-2019.001     Date : 25-Mar-2019 16:17  
Sample : SAC-11-40-24(CH4)  
Note : MStation  
Inlet : Direct     Ion Mode : Cl+  
Spectrum Type : Normal Ion [MF-Linear]  
RT : 1.75 min     Scan# : 65  
BP : m/z 332     Int. : 79.33 (831792)  
Output m/z range : 35 to 500     Cut Level : 0.00 %

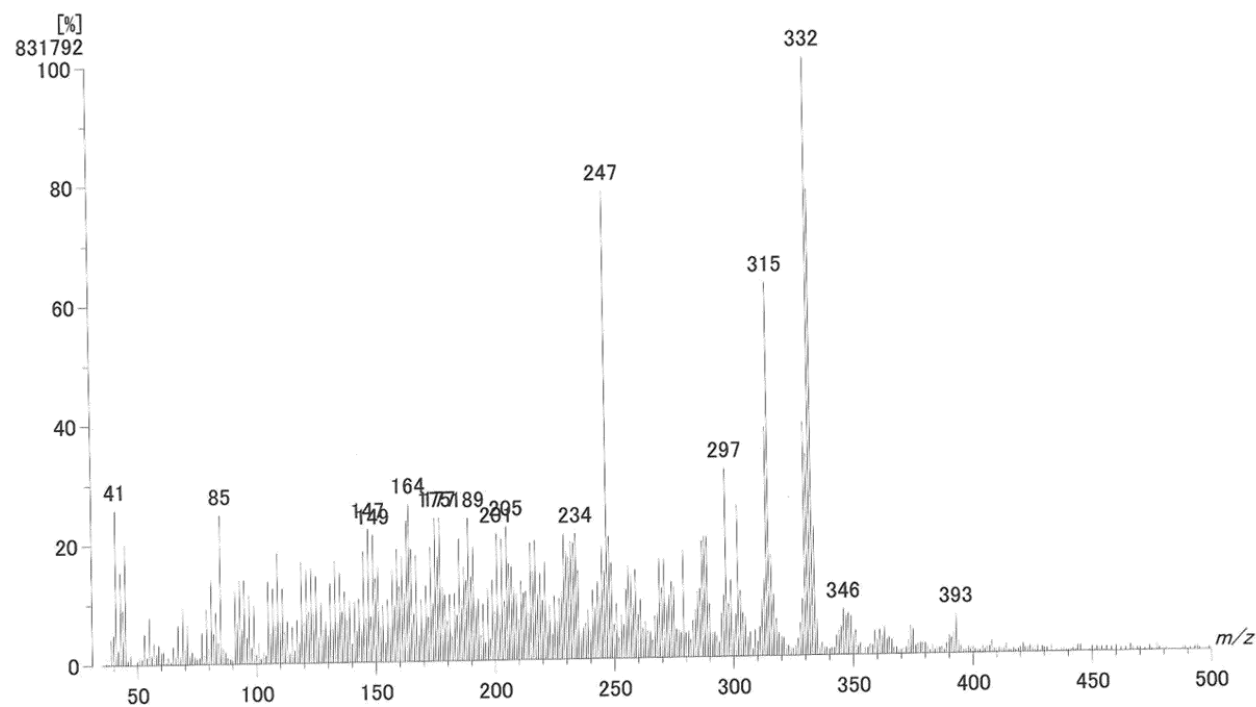

Figure S16. CI/mas of 2.

Data: Umeyama-BIHR. 27-Mar-2019.003

Date: 27-Mar-2019 08:10

Instrument: MS700D

Sample: SAS-11-40-24

Note: MStation

Inlet: Direct Ion Mode: EI+

RT: 1.68 Scan#: 43

Elements: C 150/0, H 250/0, 50/0

Mass Tolerance: 5mmu

Unsaturation (U.S.): 0.0 - 20

| Observed $M/Z$ | Int. % | Err. [ ppm / mmu] | U.S. | Composition |
|----------------|--------|-------------------|------|-------------|
| 1 332.1991     | 14.53  | - 1.1 / -0.7      | 6.0  | C20 H28 O4  |

Figure 17. HRCI/mas of 2.

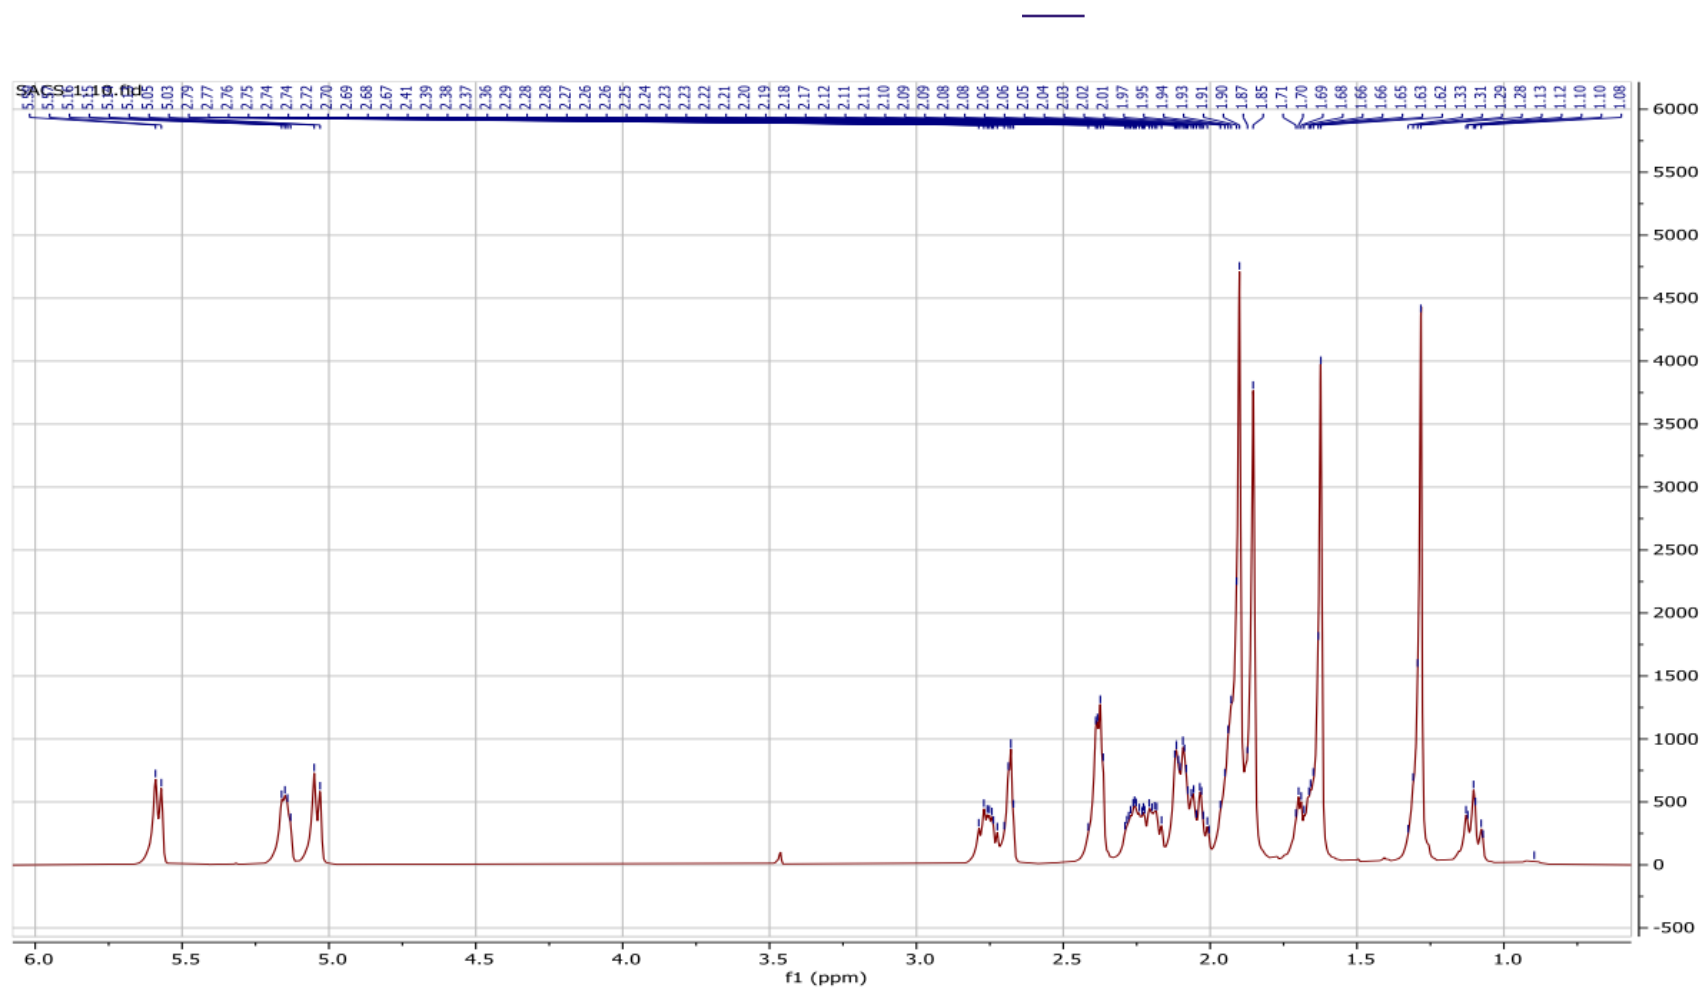

Figure S18.  $^1\text{H}$  NMR( $\text{CDCl}_3$ , 500 MHz) of 3.

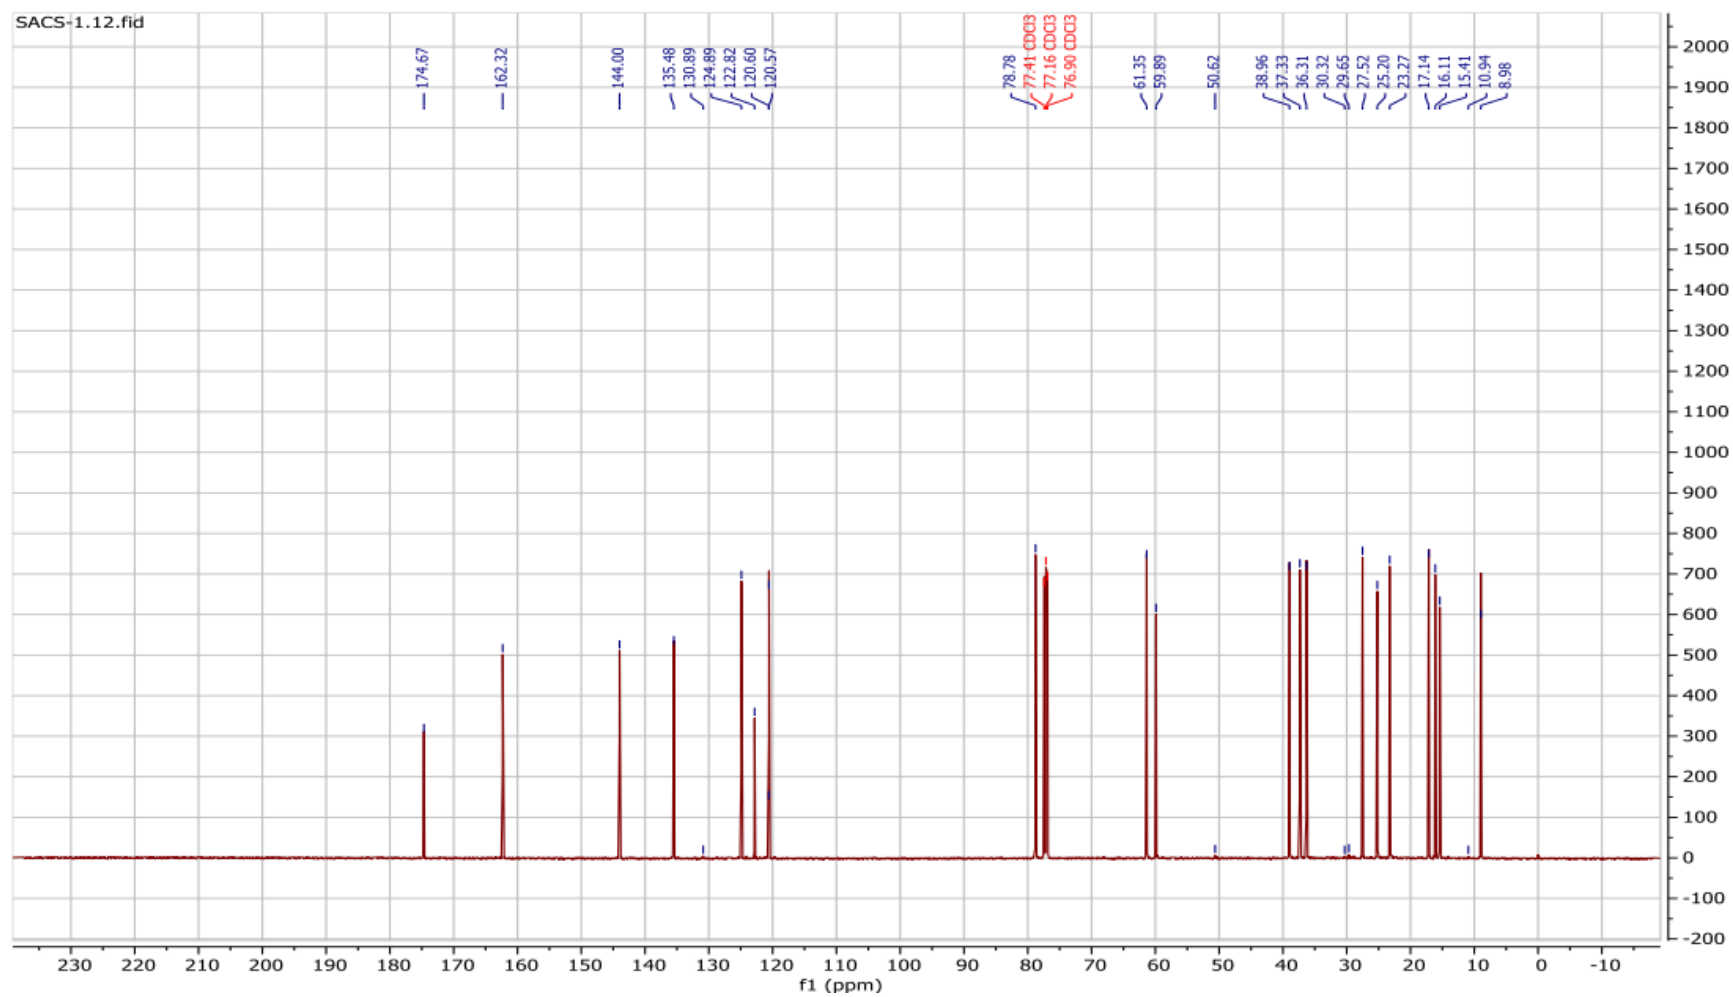

Figure S19.  $^{13}\text{C}$  NMR ( $\text{C}_5\text{D}_5\text{N}$ , 125 MHz) of **3**.

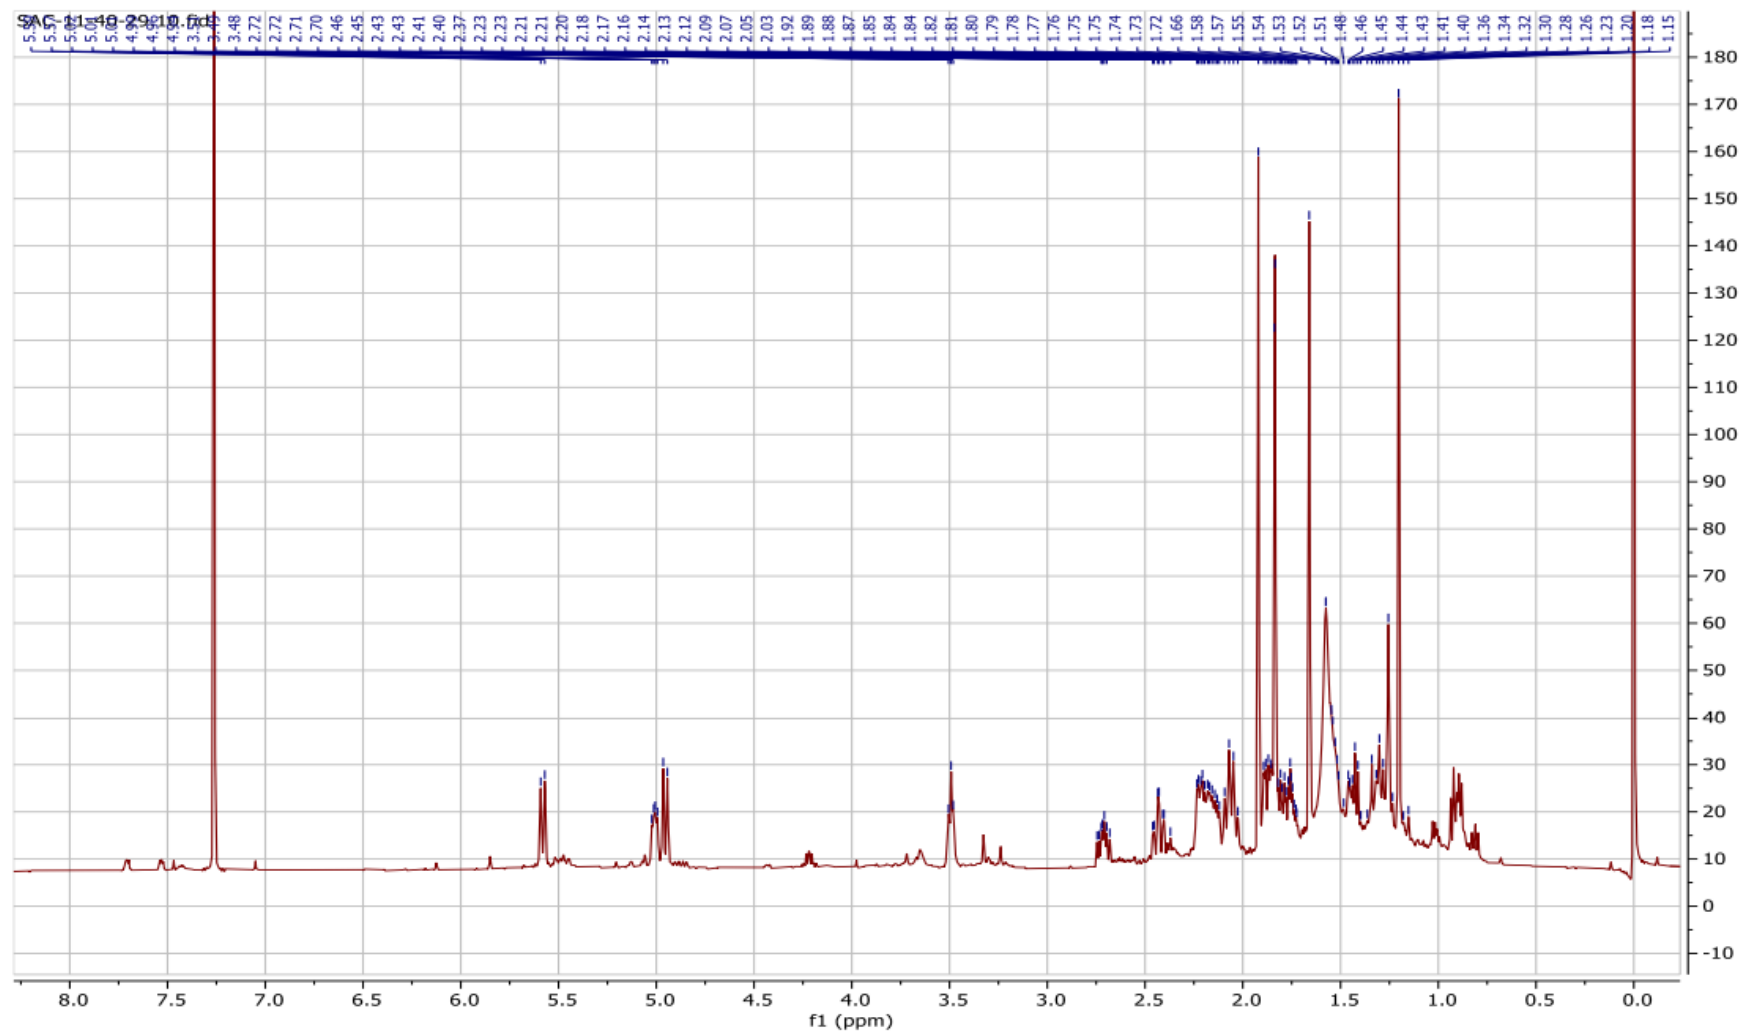

Figure S20.  $^1\text{H}$  NMR ( $\text{CDCl}_3$ , 500 MHz) of 4.

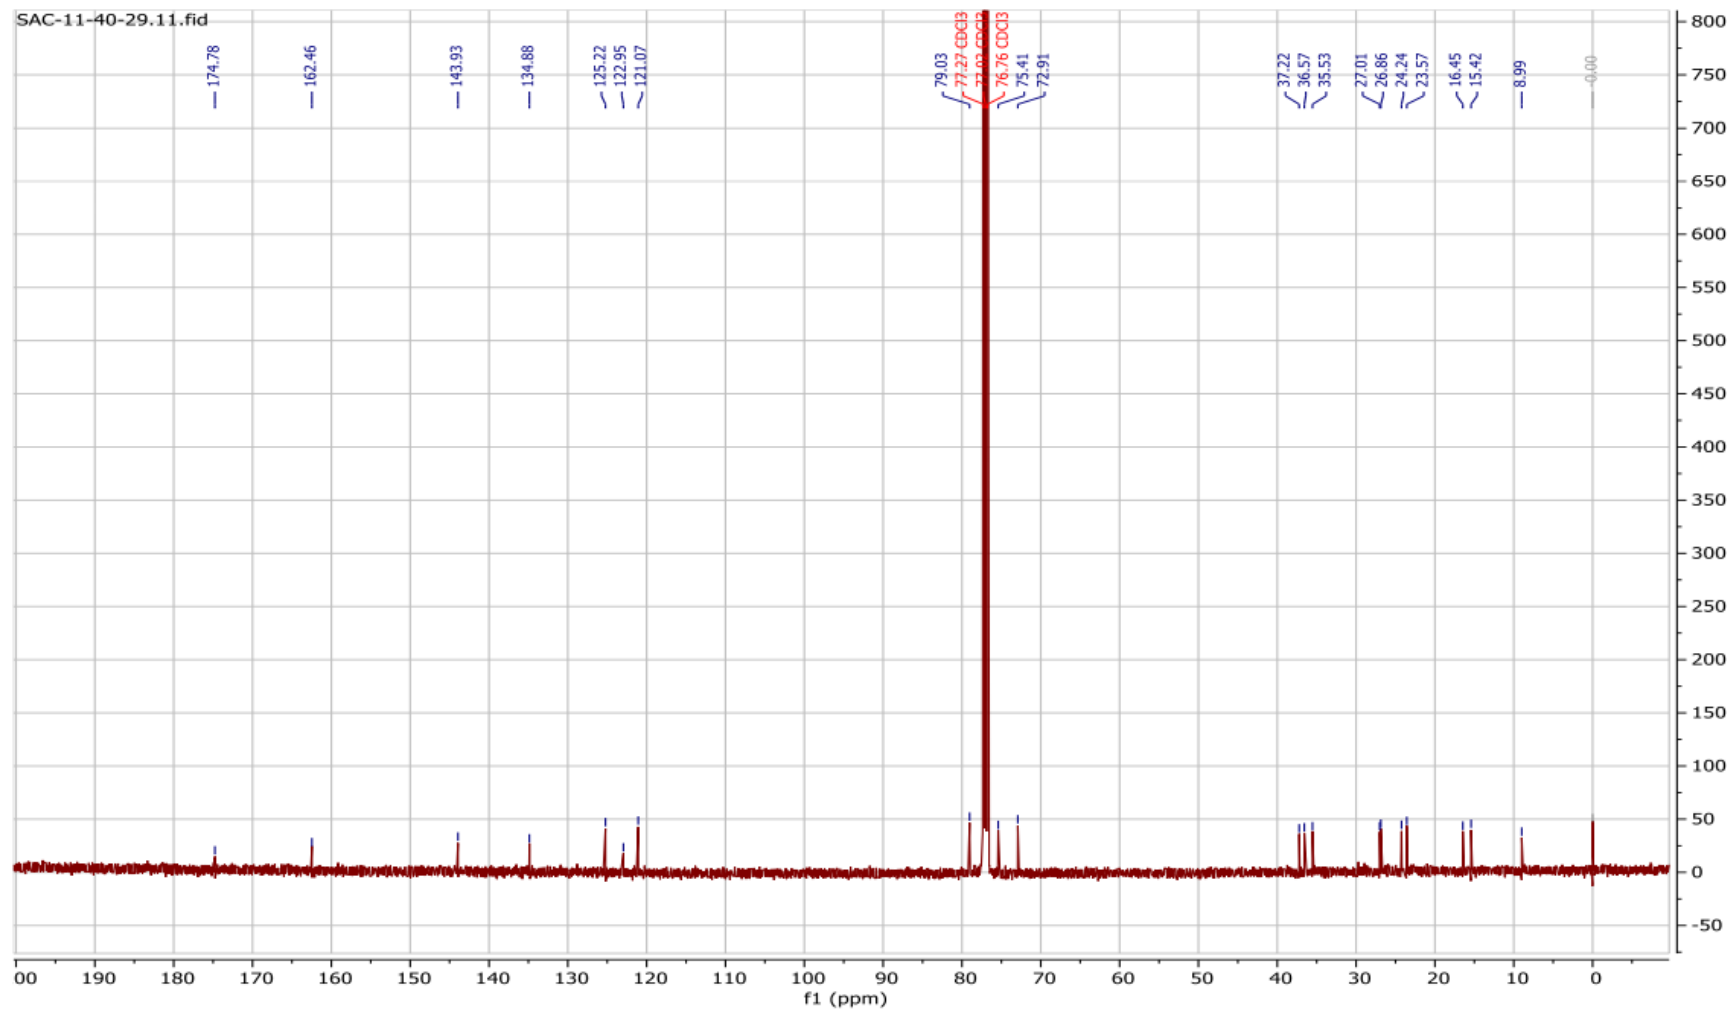

Figure S21.  $^{13}\text{C}$  NMR ( $\text{C}_5\text{D}_5\text{N}$ , 125 MHz) of **4**.

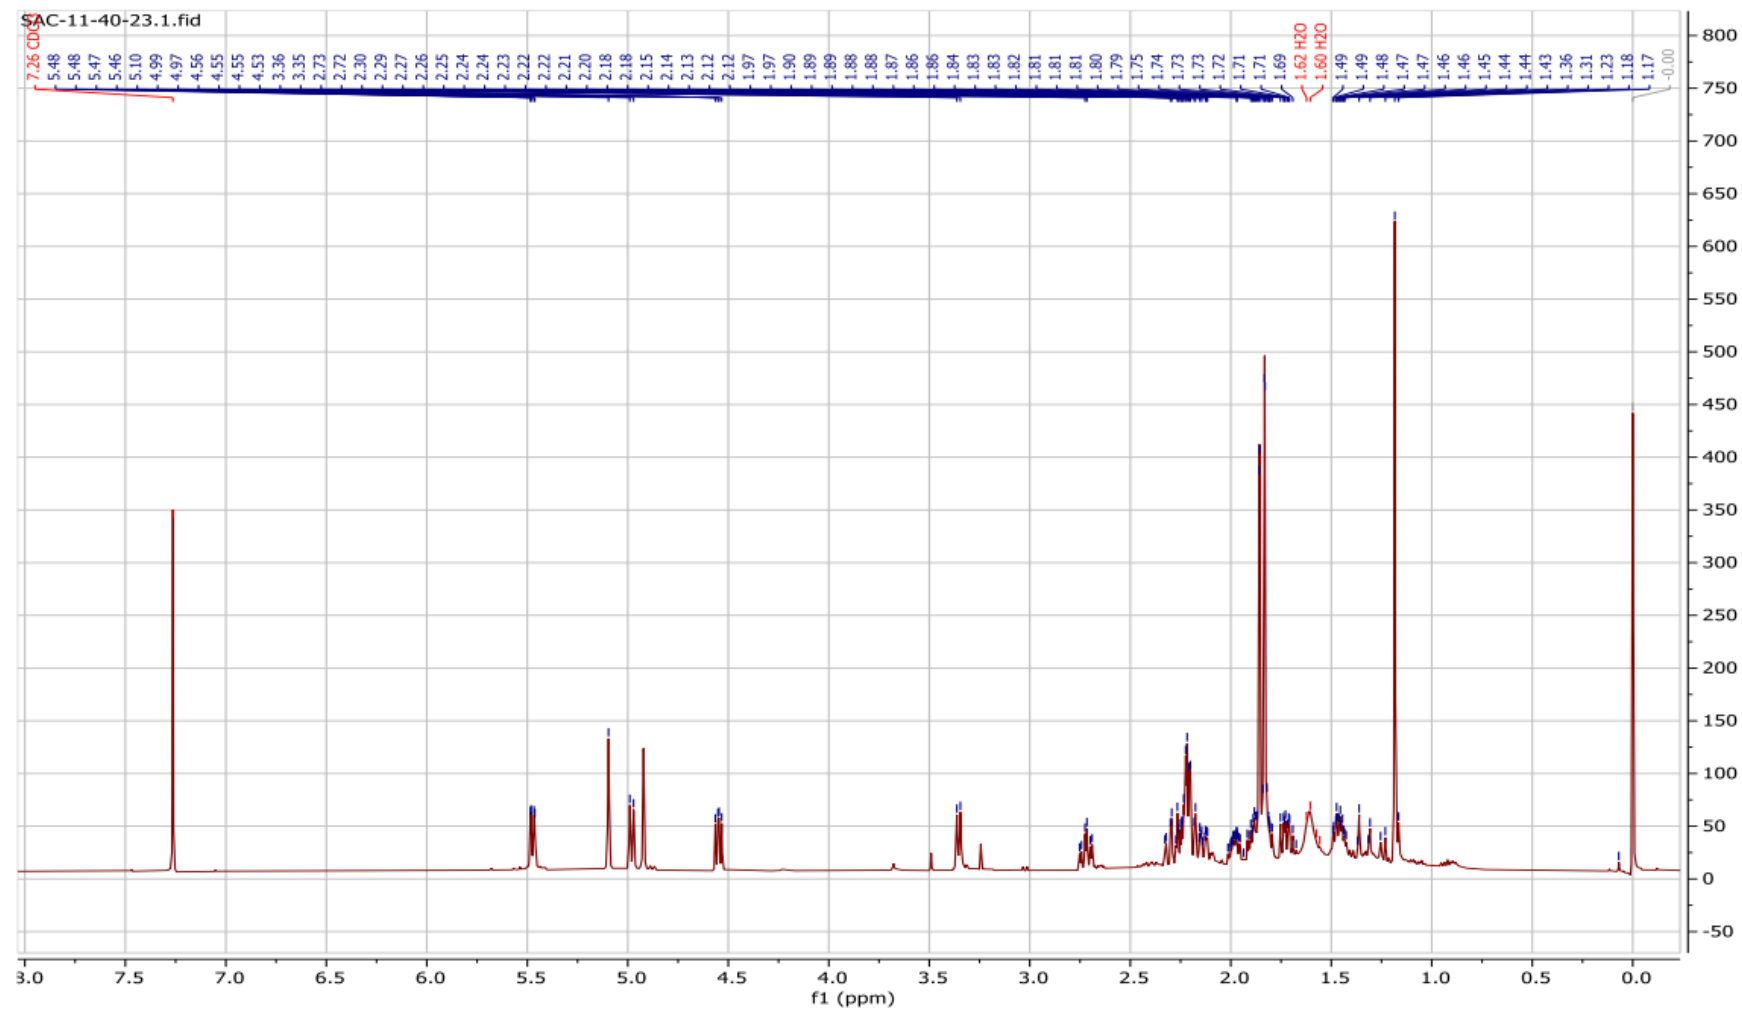

Figure S22.  $^1\text{H}$  NMR ( $\text{CDCl}_3$ , 500 MHz) of **5**.



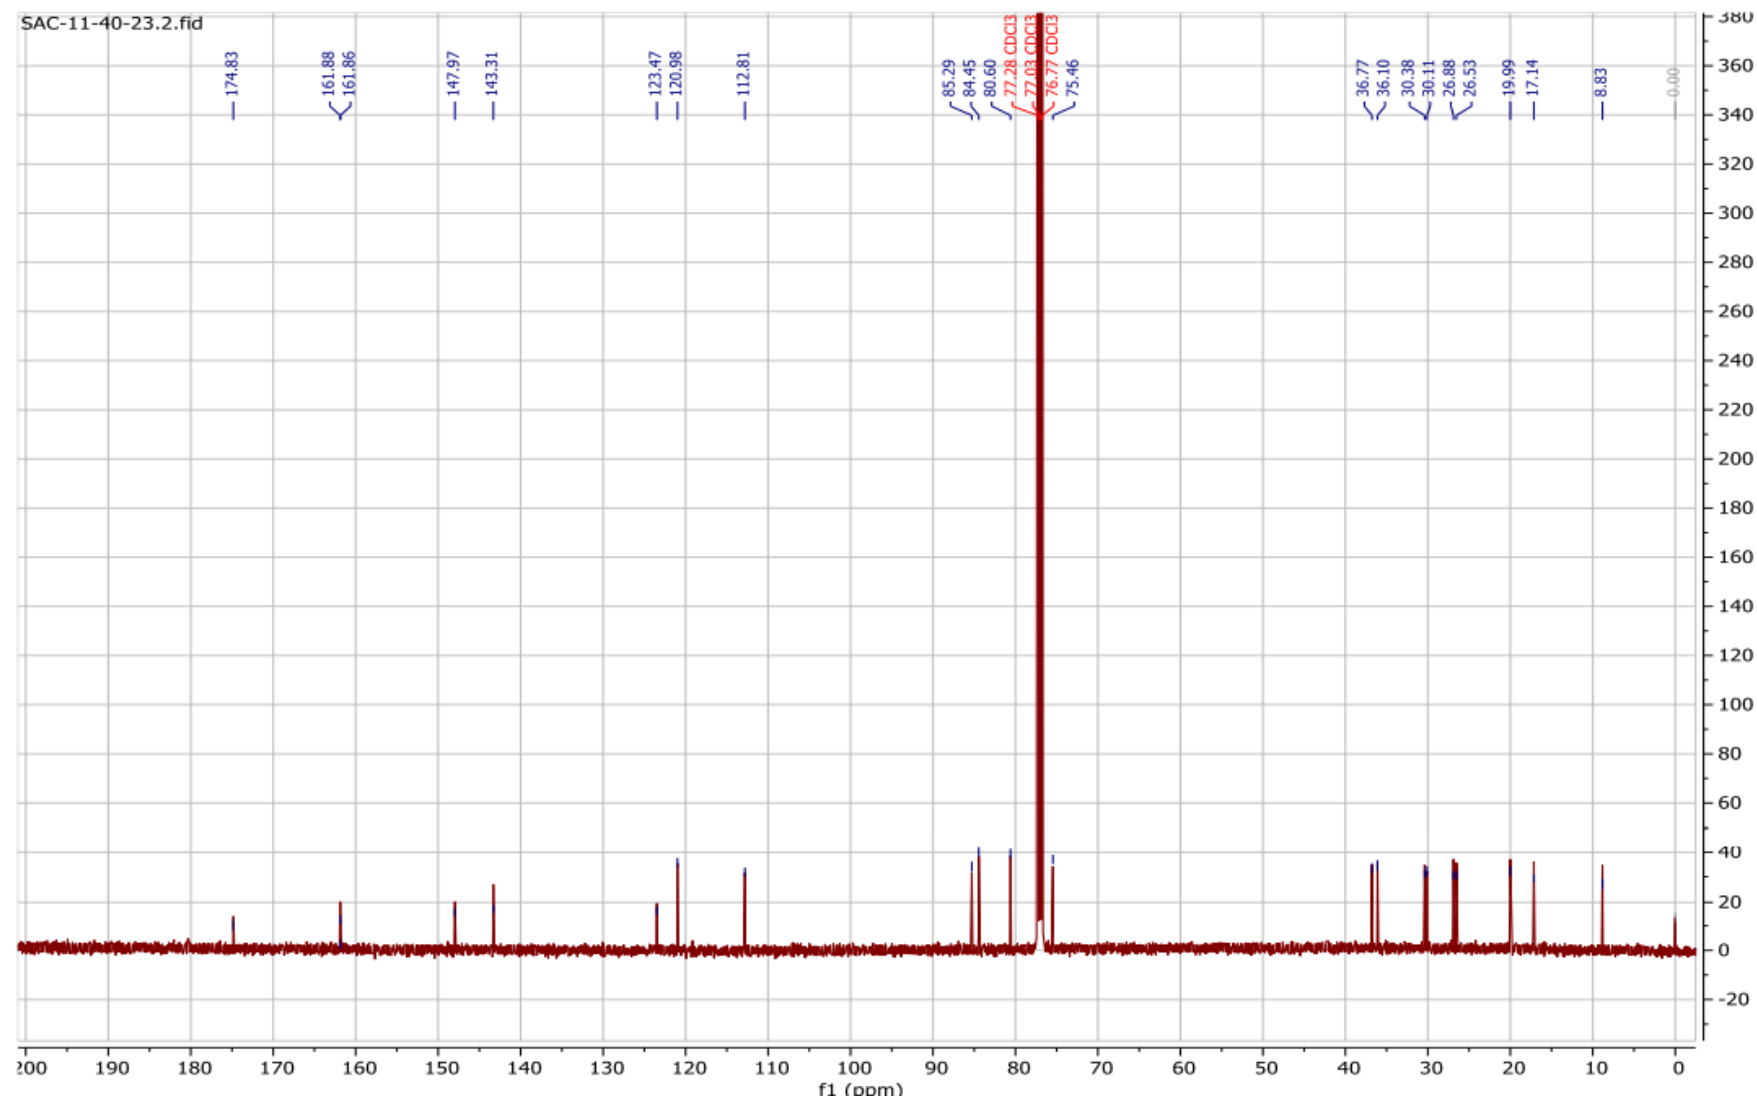

Figure S23.  $^{13}\text{C}$  NMR ( $\text{C}_5\text{D}_5\text{N}$ , 125 MHz) of 5.

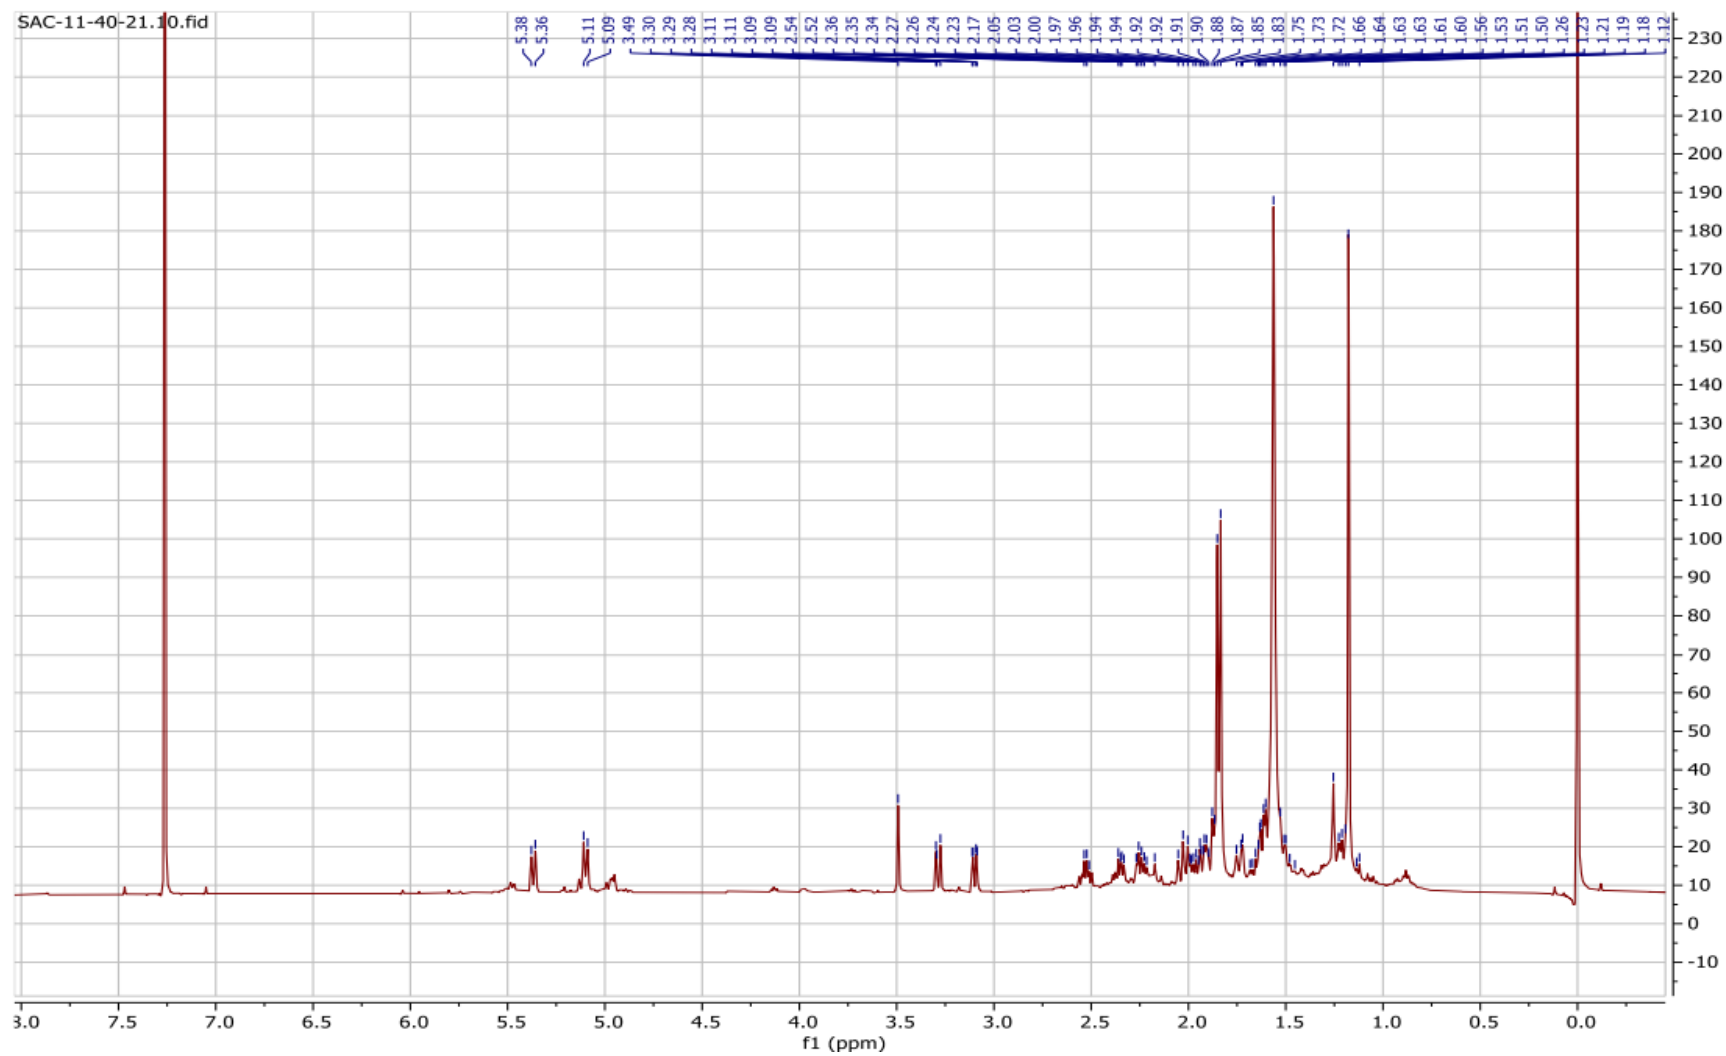

Figure S24.  $^1\text{H}$  NMR ( $\text{CDCl}_3$ , 500 MHz) of 6.

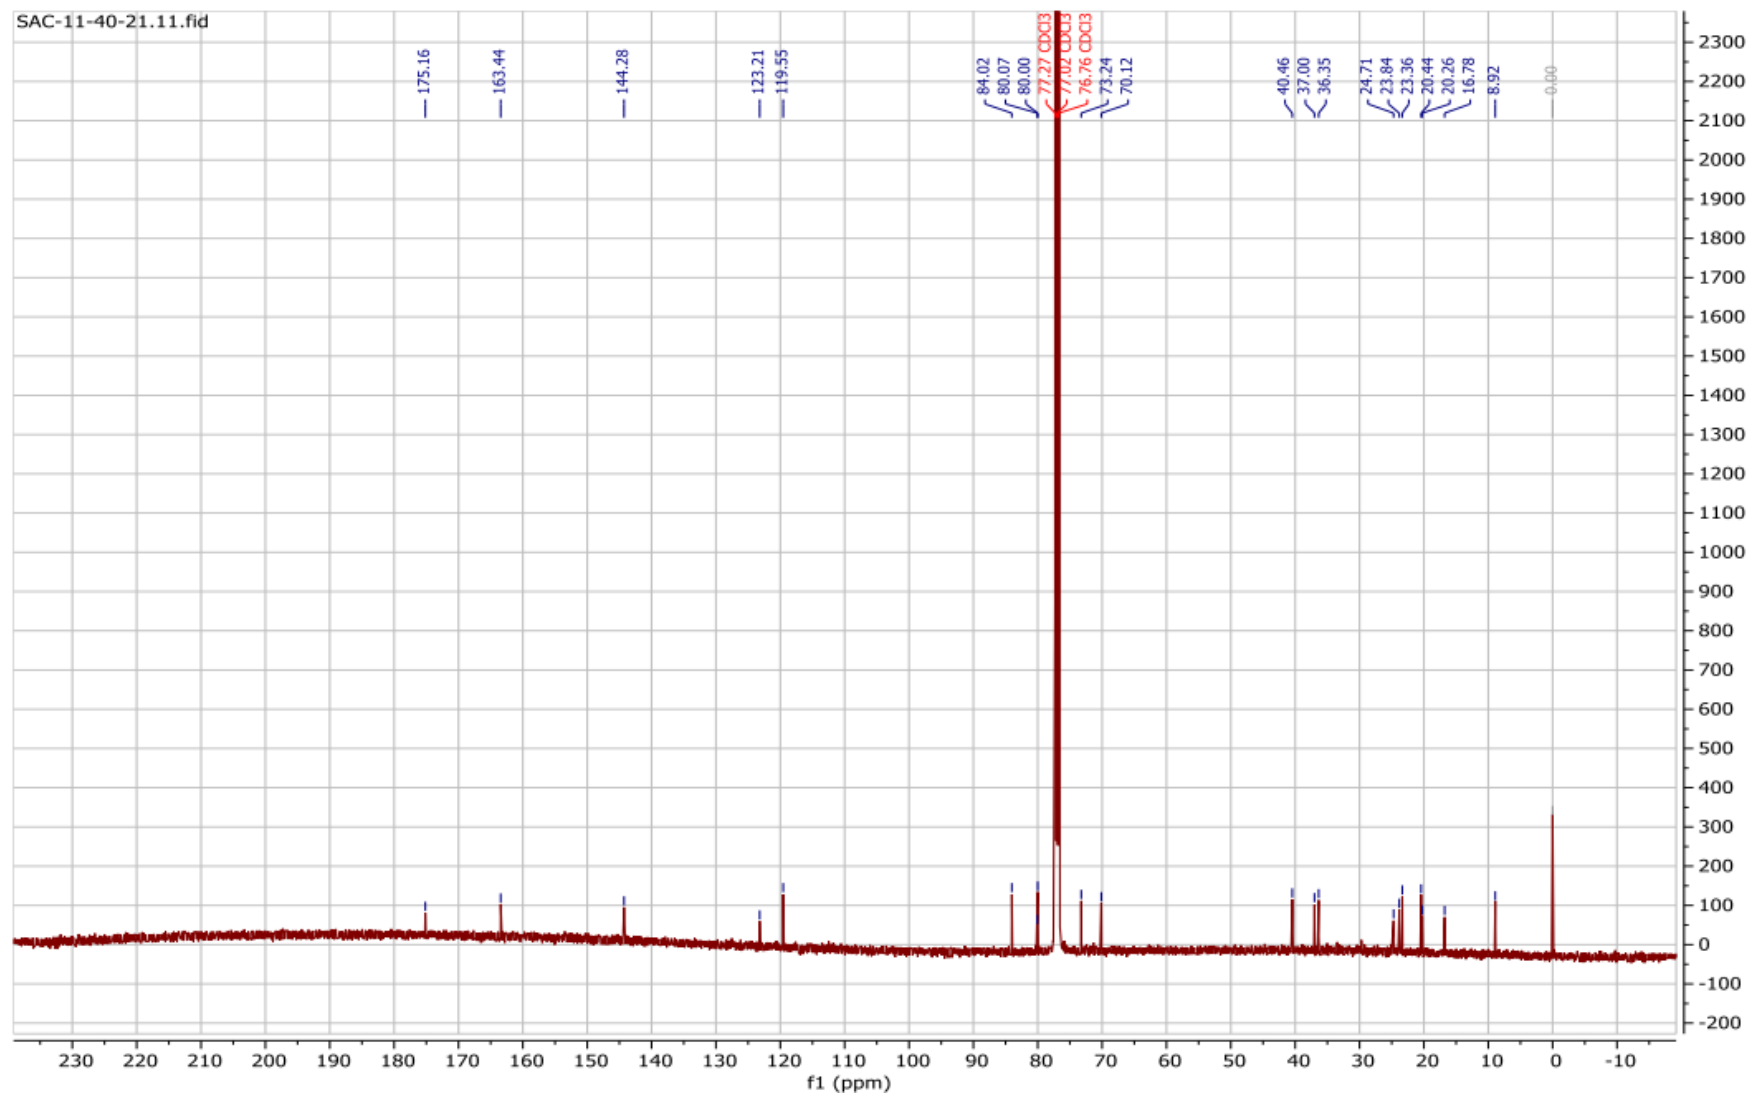

Figure S25.  $^{13}\text{C}$  NMR ( $\text{C}_5\text{D}_5\text{N}$ , 125 MHz) of **6**.

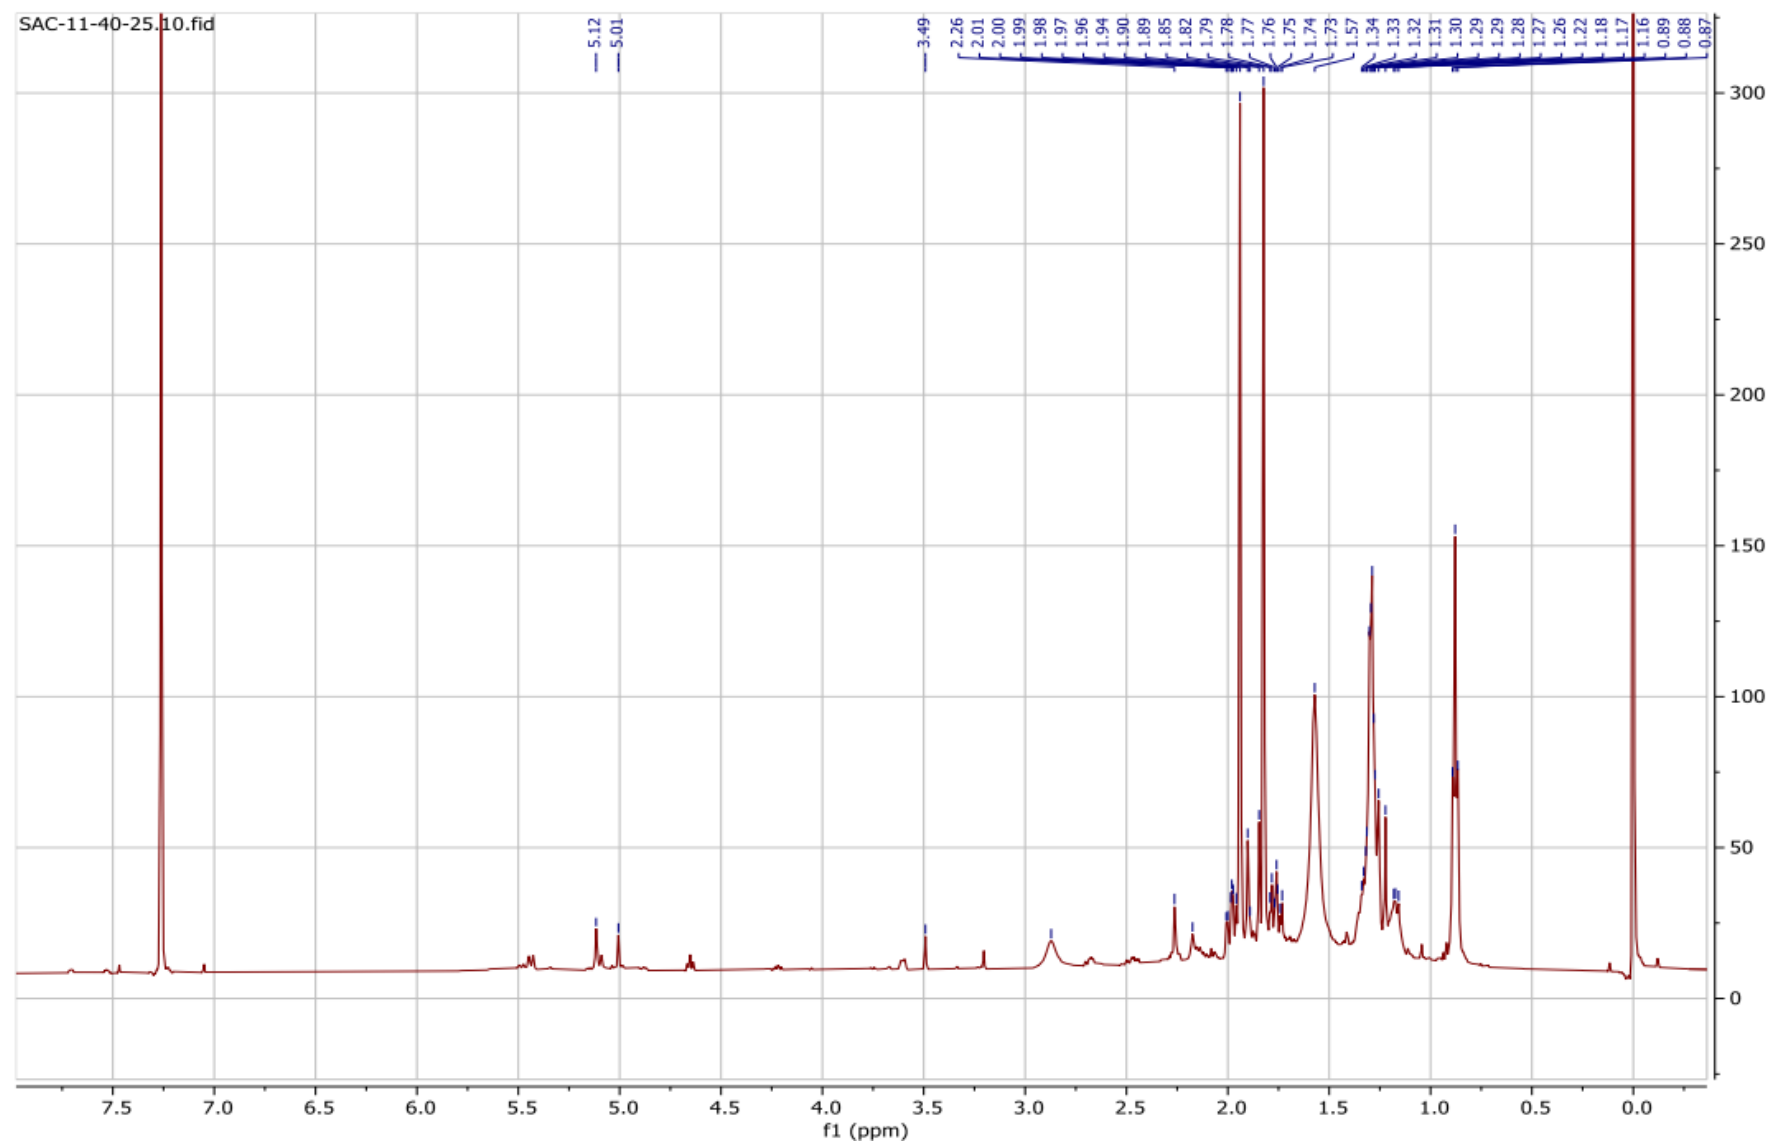

Figure S26.  $^1\text{H}$  NMR ( $\text{CDCl}_3$ , 500 MHz) of 7.

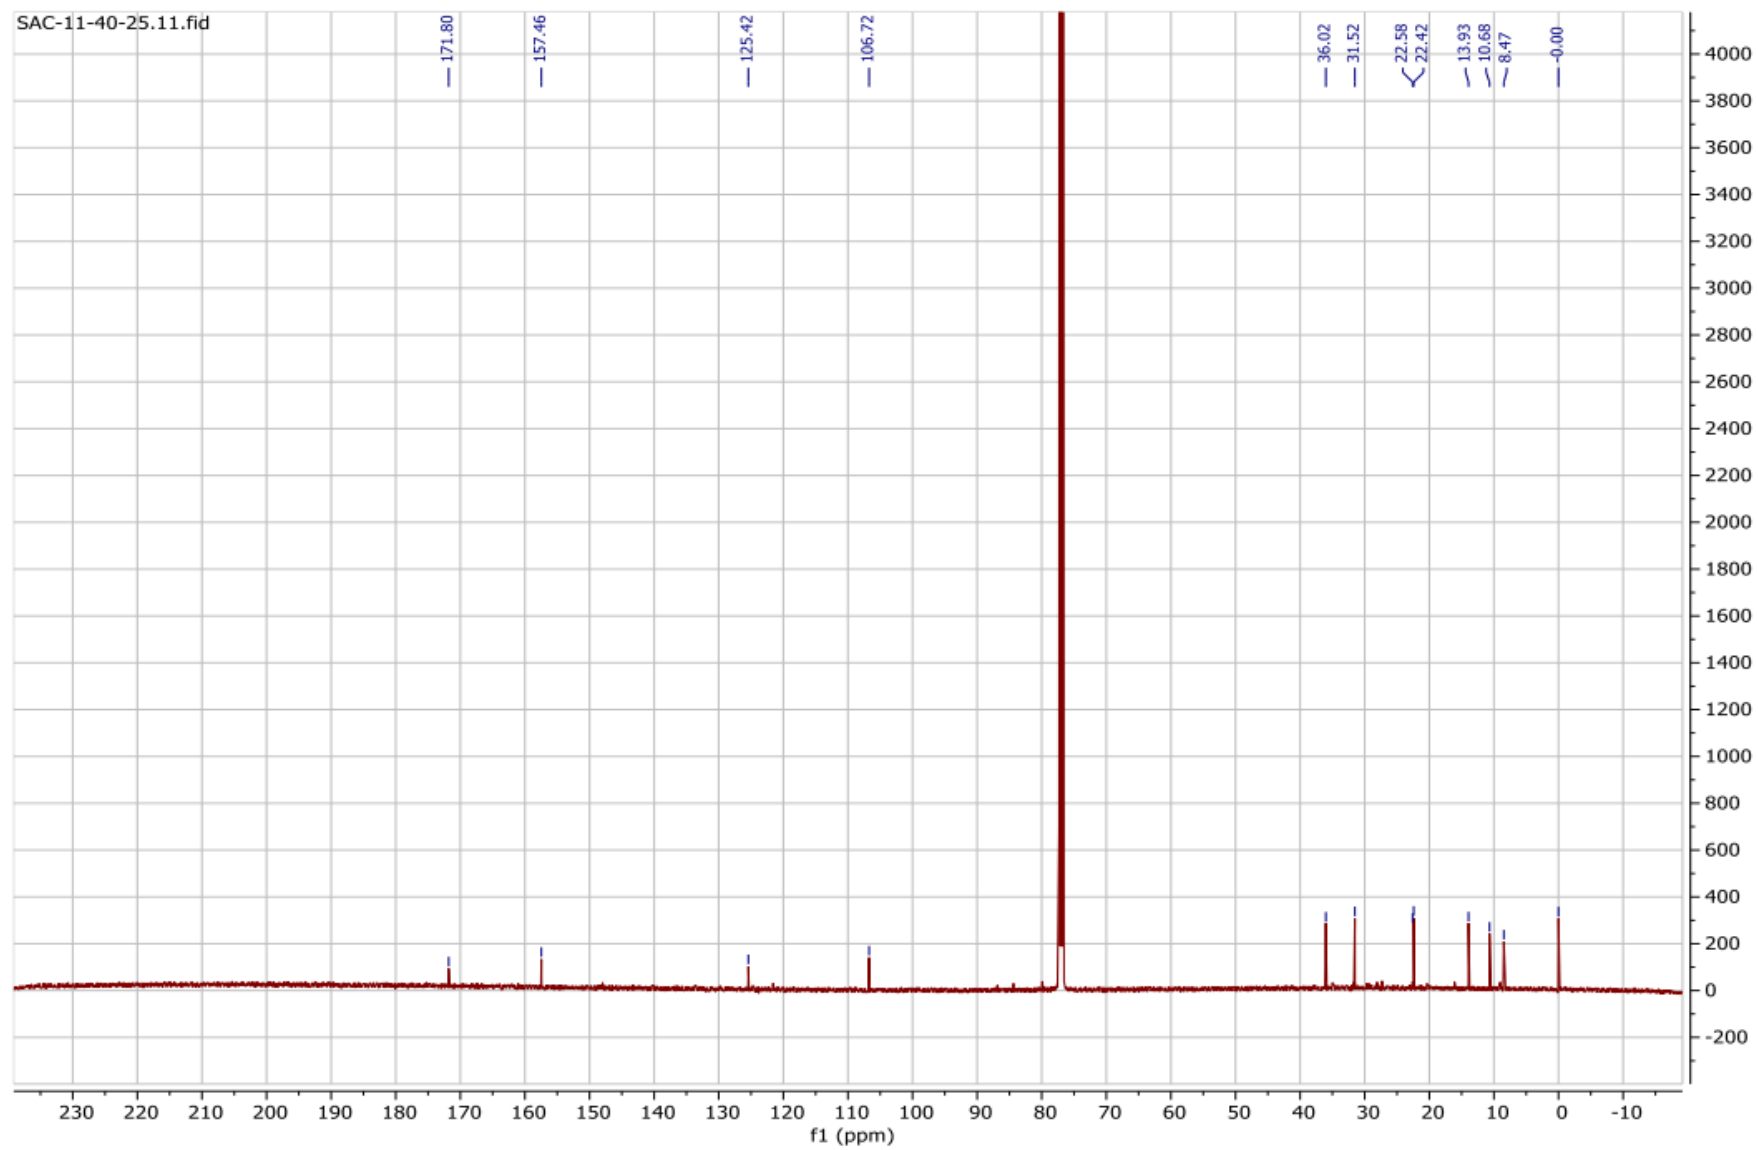

Figure S27.  $^{13}\text{C}$  NMR ( $\text{C}_5\text{D}_5\text{N}$ , 125 MHz) of 7.
